# Supplementary material for: Analyzing Fluoride Binding by Group 15 Lewis Acids: Pnictogen Bonding in the Pentavalent State
Source: PubMed Central journal article supplement (PMC10862541; doi:10.1021/acs.inorgchem.3c01987), 2023-08-08
Supplement: ic3c01987_si_001.pdf [file ic3c01987_si_001.pdf]

# Analyzing Fluoride Binding by Group 15 Lewis Acids: Pnictogen

## Bonding in the Pentavalent State

Logan T. Maltz and François P. Gabbaï\*

Department of Chemistry, Texas A&M University, College Station, Texas 77843-3255, United States

## SUPPORTING INFORMATION

This PDF file includes

### Contents

|                                               |    |
|-----------------------------------------------|----|
| Full Data Table .....                         | S2 |
| Energy Decomposition Bar Graphs .....         | S3 |
| XYZ Coordinates of Optimized Geometries ..... | S8 |

## Full Data Table

**Table S1.** Activation Strain and Energy Decomposition Analyses (in kcal mol<sup>-1</sup>) at Optimized Geometries

| Acid                                                             | $\Delta E$ | $\Delta E_{\text{strain}}$ | $\Delta E_{\text{int}}$ | $\Delta E_{\text{disp}}$ | $\Delta E_{\text{el}}$ | $\Delta E_{\text{oi}}$ | $\Delta E_{\text{Pauli}}$ | $d_{\text{Pn}\cdots\text{F}}$ (Å) | Charge <sup>a</sup> | $E_{\text{LUMO}}$ (eV) <sup>b</sup> |
|------------------------------------------------------------------|------------|----------------------------|-------------------------|--------------------------|------------------------|------------------------|---------------------------|-----------------------------------|---------------------|-------------------------------------|
| <b>F<sup>-</sup>⋯PnF<sub>3</sub></b>                             |            |                            |                         |                          |                        |                        |                           |                                   |                     |                                     |
| PF <sub>3</sub>                                                  | -49.6      | 18.5                       | -68.1                   | 0.0                      | -173.2                 | -125.6                 | 230.7                     | 1.738 <sup>c</sup>                | 1.77                | -2.16                               |
| AsF <sub>3</sub>                                                 | -60.1      | 10.2                       | -70.4                   | 0.0                      | -161.9                 | -95.3                  | 186.8                     | 1.847 <sup>c</sup>                | 1.84                | -2.50                               |
| SbF <sub>3</sub>                                                 | -71.2      | 9.0                        | -80.2                   | 0.0                      | -161.0                 | -81.5                  | 162.2                     | 1.989 <sup>c</sup>                | 1.98                | -3.03                               |
| BiF <sub>3</sub>                                                 | -72.9      | 5.8                        | -78.7                   | 0.0                      | -142.9                 | -62.9                  | 127.1                     | 2.119 <sup>c</sup>                | 2.00                | -2.94                               |
| <b>F<sup>-</sup>⋯PnF<sub>5</sub></b>                             |            |                            |                         |                          |                        |                        |                           |                                   |                     |                                     |
| PF <sub>5</sub>                                                  | -91.6      | 51.8                       | -143.4                  | 0.0                      | -220.1                 | -154.1                 | 230.9                     | 1.634                             | 2.71                | -5.49                               |
| AsF <sub>5</sub>                                                 | -104.5     | 33.0                       | -137.5                  | 0.0                      | -215.1                 | -129.8                 | 207.5                     | 1.738                             | 2.76                | -6.37                               |
| SbF <sub>5</sub>                                                 | -120.3     | 23.7                       | -144.1                  | -0.1                     | -209.3                 | -101.4                 | 166.7                     | 1.900                             | 2.96                | -6.52                               |
| BiF <sub>5</sub>                                                 | -116.9     | 17.3                       | -134.1                  | -0.1                     | -194.2                 | -92.4                  | 152.6                     | 1.997                             | 2.80                | -7.34                               |
| <b>F<sup>-</sup>⋯PnCl<sub>5</sub></b>                            |            |                            |                         |                          |                        |                        |                           |                                   |                     |                                     |
| PCl <sub>5</sub>                                                 | -97.1      | 30.9                       | -128.0                  | 0.0                      | -228.6                 | -201.0                 | 301.6                     | 1.618                             | 0.93                | -5.66                               |
| AsCl <sub>5</sub>                                                | -94.6      | 22.0                       | -116.6                  | -0.1                     | -212.1                 | -156.0                 | 251.6                     | 1.737                             | 1.12                | -6.09                               |
| SbCl <sub>5</sub>                                                | -106.1     | 18.3                       | -124.4                  | -0.1                     | -200.9                 | -120.9                 | 197.4                     | 1.904                             | 1.60                | -5.90                               |
| BiCl <sub>5</sub>                                                | -102.2     | 14.6                       | -116.9                  | -0.1                     | -184.1                 | -105.3                 | 172.6                     | 2.004                             | 1.55                | -6.68                               |
| <b>F<sup>-</sup>⋯PnBr<sub>5</sub></b>                            |            |                            |                         |                          |                        |                        |                           |                                   |                     |                                     |
| PBr <sub>5</sub>                                                 | -97.9      | 24.2                       | -122.2                  | 0.0                      | -228.0                 | -209.8                 | 315.7                     | 1.620                             | 0.52                | -5.56                               |
| AsBr <sub>5</sub>                                                | -91.9      | 17.9                       | -109.7                  | -0.1                     | -209.1                 | -160.5                 | 259.9                     | 1.741                             | 0.70                | -5.87                               |
| SbBr <sub>5</sub>                                                | -101.6     | 15.5                       | -117.1                  | -0.1                     | -195.9                 | -124.9                 | 203.7                     | 1.910                             | 1.21                | -5.62                               |
| BiBr <sub>5</sub>                                                | -97.0      | 12.7                       | -109.7                  | -0.1                     | -179.3                 | -107.5                 | 177.3                     | 2.011                             | 1.21                | -6.27                               |
| <b>F<sup>-</sup>⋯PnPh<sub>4</sub><sup>+</sup></b>                |            |                            |                         |                          |                        |                        |                           |                                   |                     |                                     |
| PPh <sub>4</sub> <sup>+</sup>                                    | -125.4     | 33.3                       | -158.7                  | -0.5                     | -251.1                 | -155.8                 | 248.7                     | 1.724                             | 1.52                | -5.37                               |
| AsPh <sub>4</sub> <sup>+</sup>                                   | -123.4     | 23.7                       | -147.1                  | -0.5                     | -230.8                 | -118.9                 | 203.2                     | 1.852                             | 1.64                | -5.32                               |
| SbPh <sub>4</sub> <sup>+</sup>                                   | -142.0     | 18.6                       | -160.6                  | -0.4                     | -229.4                 | -102.2                 | 171.4                     | 2.000                             | 1.94                | -5.81                               |
| BiPh <sub>4</sub> <sup>+</sup>                                   | -138.9     | 14.2                       | -153.0                  | -0.4                     | -206.1                 | -84.9                  | 138.3                     | 2.132                             | 1.78                | -6.01                               |
| <b>F<sup>-</sup>⋯PnPh<sub>3</sub>Cat (F <i>trans</i> to Ph)</b>  |            |                            |                         |                          |                        |                        |                           |                                   |                     |                                     |
| PPh <sub>3</sub> Cat                                             | -75.0      | 31.3                       | -106.3                  | -0.5                     | -199.4                 | -170.2                 | 263.8                     | 1.683                             | 1.76                | -2.94                               |
| AsPh <sub>3</sub> Cat                                            | -73.2      | 20.6                       | -93.8                   | -0.5                     | -180.5                 | -135.3                 | 222.5                     | 1.801                             | 1.89                | -3.13                               |
| SbPh <sub>3</sub> Cat                                            | -85.9      | 16.0                       | -101.8                  | -0.5                     | -172.4                 | -112.9                 | 184.0                     | 1.955                             | 2.23                | -3.30                               |
| BiPh <sub>3</sub> Cat                                            | -78.8      | 12.8                       | -91.6                   | -0.5                     | -152.1                 | -98.7                  | 159.6                     | 2.065                             | 2.05                | -3.69                               |
| <b>F<sup>-</sup>⋯PnPh<sub>3</sub>Cat (F <i>trans</i> to Cat)</b> |            |                            |                         |                          |                        |                        |                           |                                   |                     |                                     |
| PPh <sub>3</sub> Cat                                             | -78.3      | 46.4                       | -124.6                  | -0.5                     | -207.6                 | -174.3                 | 257.8                     | 1.659                             | 1.87                | -3.48                               |
| AsPh <sub>3</sub> Cat                                            | -74.4      | 35.3                       | -109.7                  | -0.5                     | -189.4                 | -136.0                 | 216.2                     | 1.787                             | 1.99                | -3.57                               |
| SbPh <sub>3</sub> Cat                                            | -84.4      | 26.1                       | -110.5                  | -0.5                     | -178.9                 | -111.2                 | 180.0                     | 1.950                             | 2.30                | -3.63                               |
| BiPh <sub>3</sub> Cat                                            | -81.9      | 17.3                       | -99.2                   | -0.5                     | -154.8                 | -91.0                  | 147.2                     | 2.075                             | 2.11                | -3.72                               |

<sup>a</sup>NPA charge in strained acid without F. <sup>b</sup>LUMO energy in strained acid without F. <sup>c</sup>Smaller of two Pn⋯F distances.

## Energy Decomposition Bar Graphs

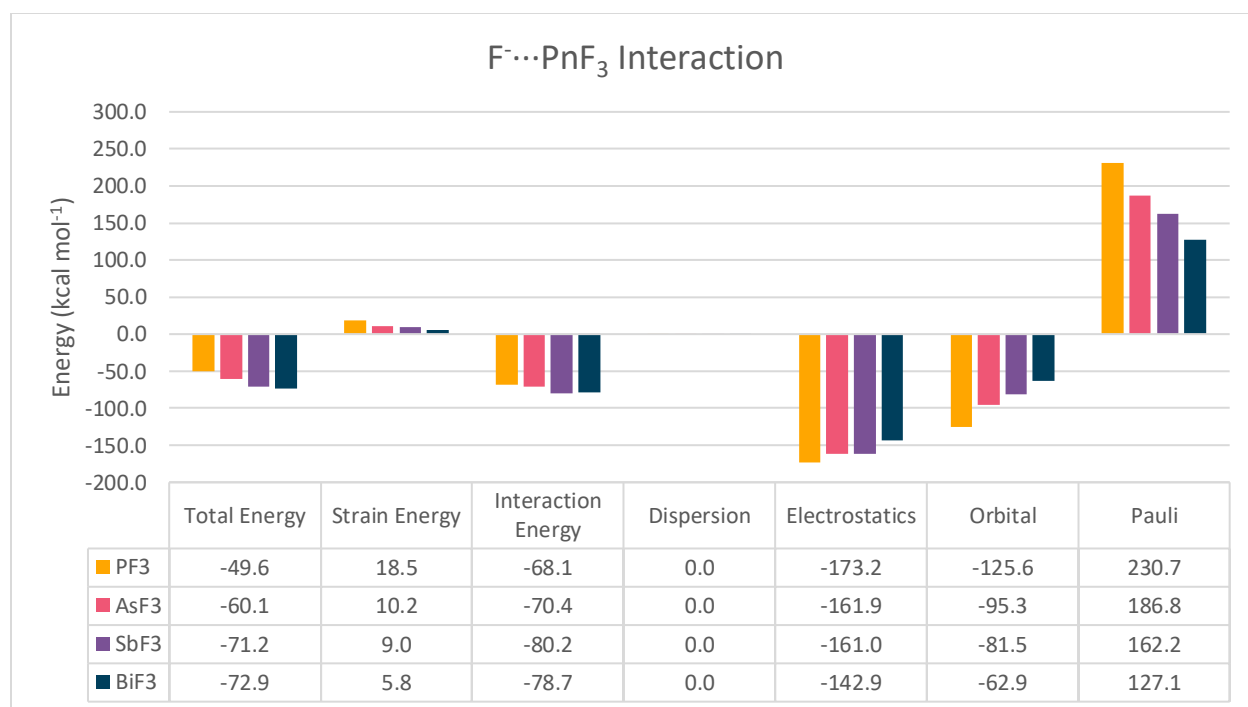

**Graph S1.** Bar graph of F<sup>-</sup>...PnF<sub>3</sub> interaction

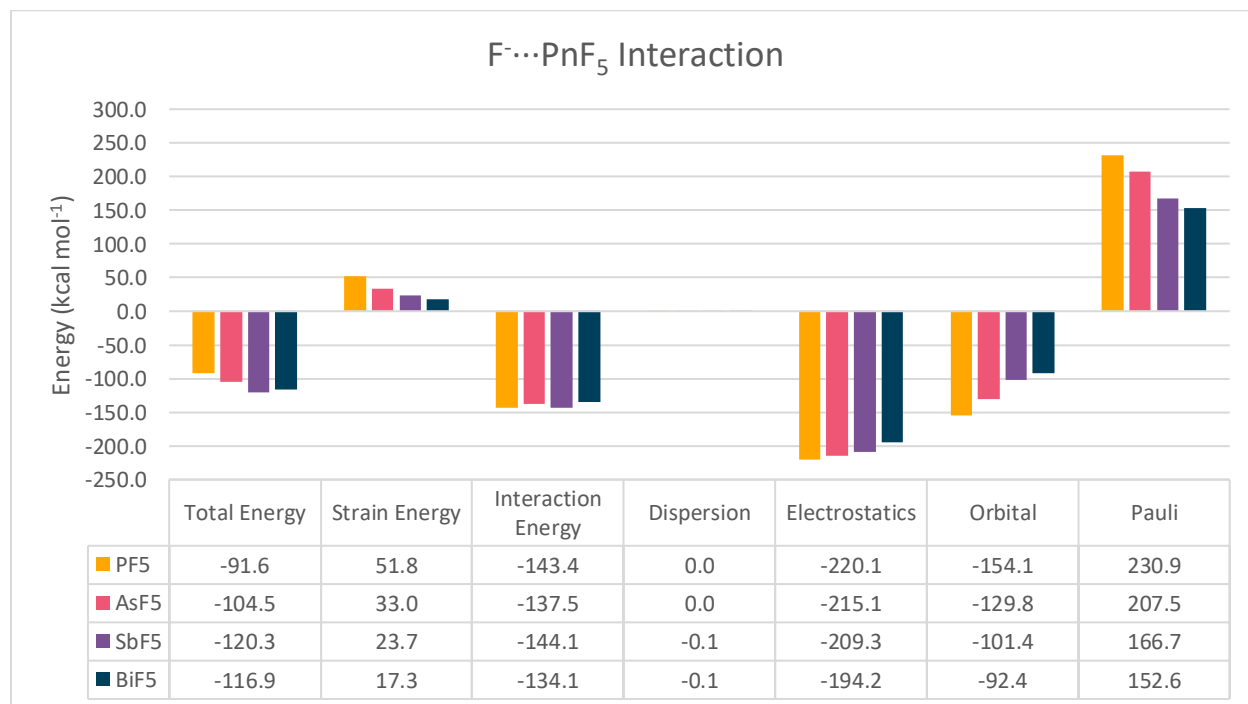

**Graph S2.** Bar graph of F<sup>-</sup>...PnF<sub>5</sub> interaction

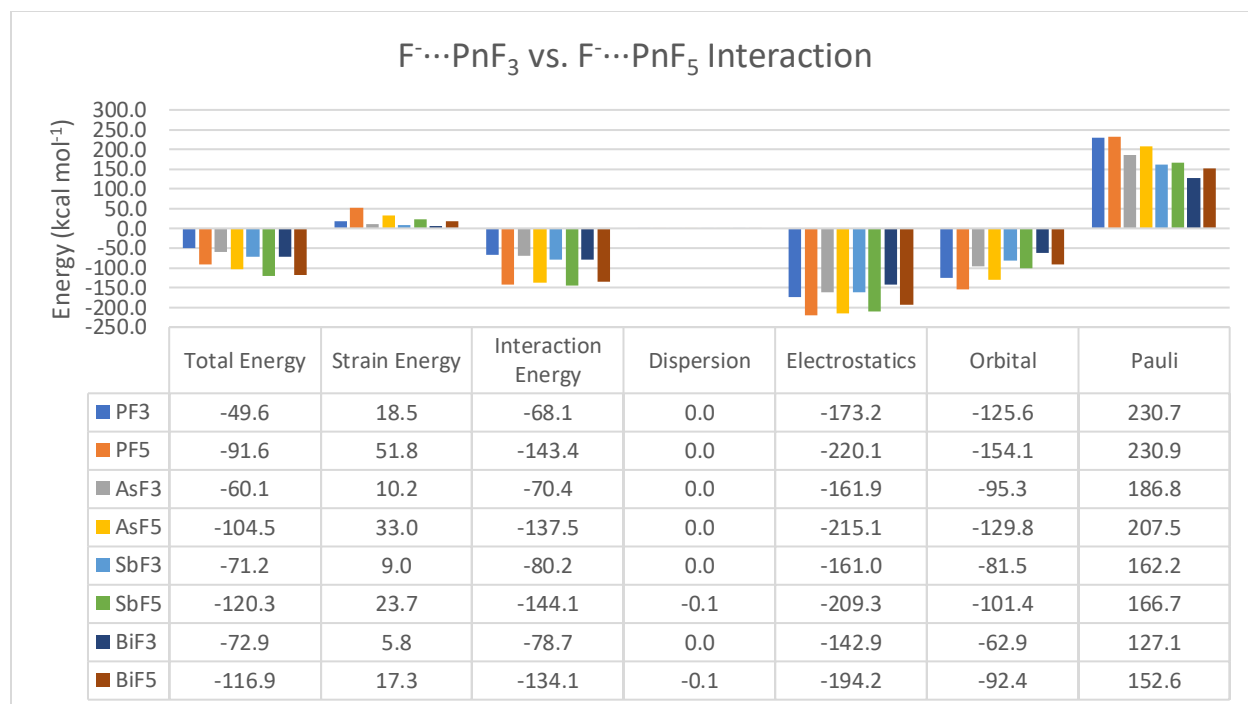

**Graph S3.** Bar graph of F<sup>-</sup>···PnF<sub>3</sub> vs. F<sup>-</sup>···PnF<sub>5</sub> interaction

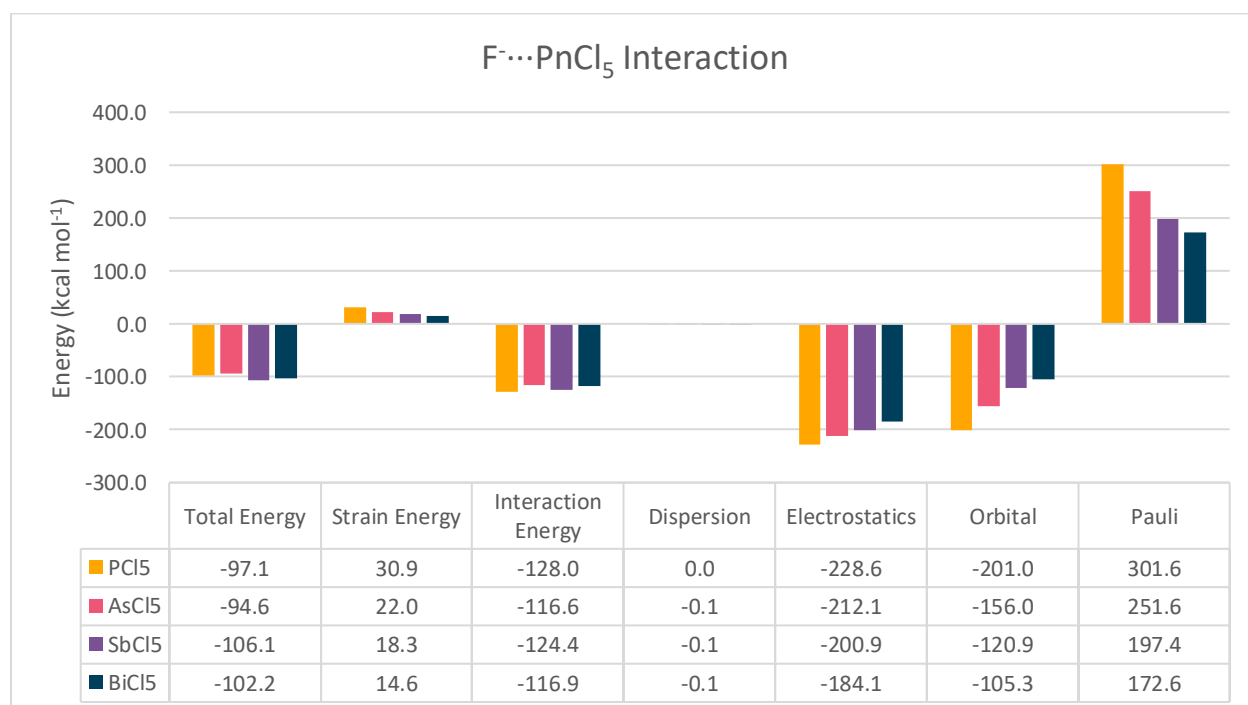

**Graph S4.** Bar graph of F<sup>-</sup>···PnCl<sub>5</sub>

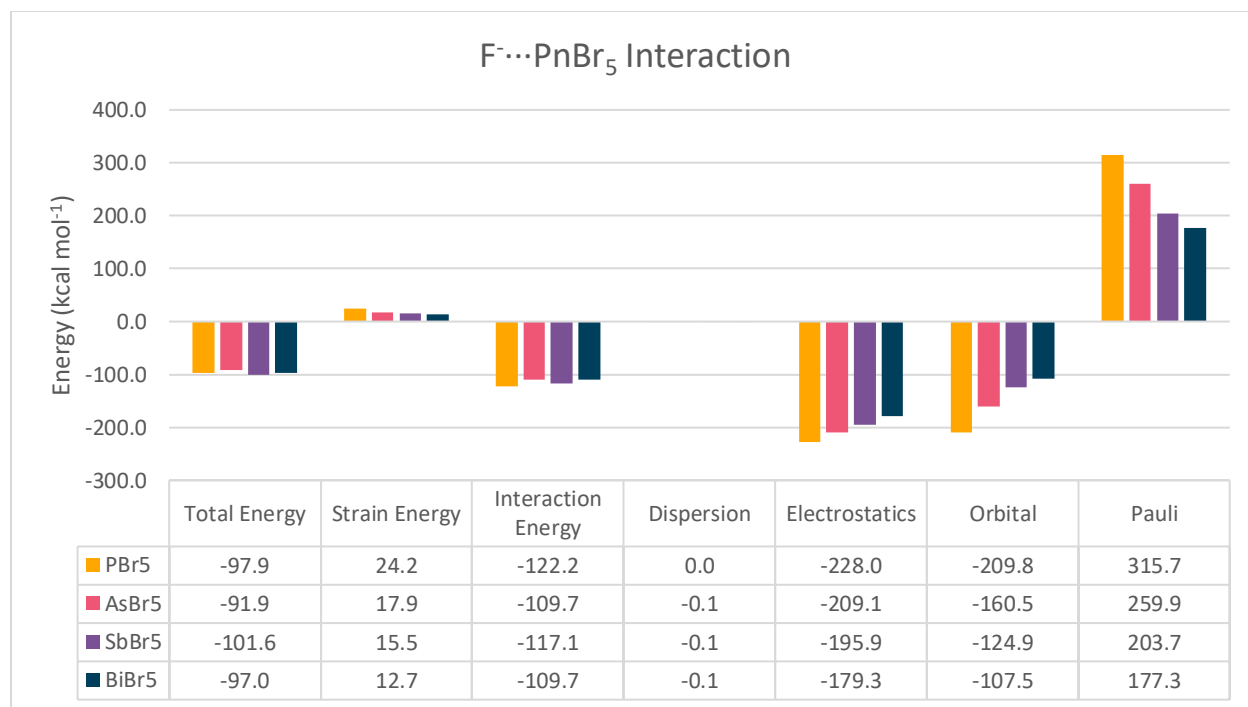

**Graph S5.** Bar graph of F<sup>-</sup>⋯PnBr<sub>5</sub>

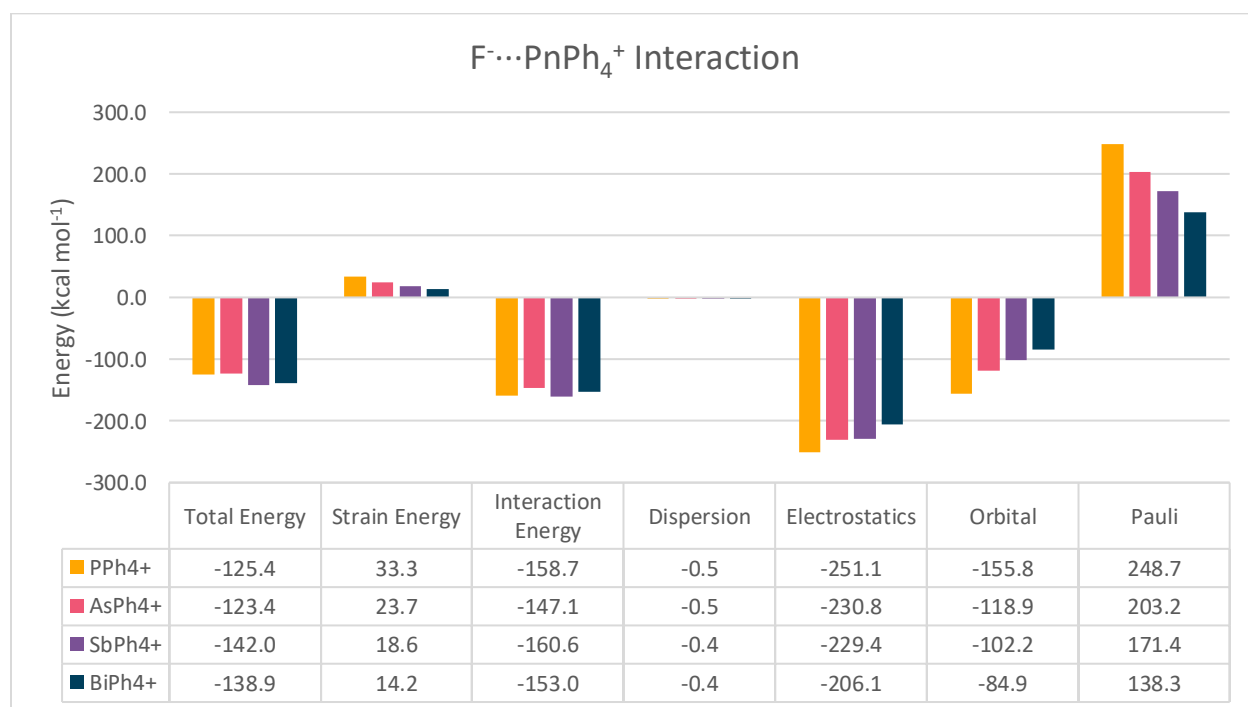

**Graph S6.** Bar graph of F<sup>-</sup>⋯PnPh<sub>4</sub><sup>+</sup>

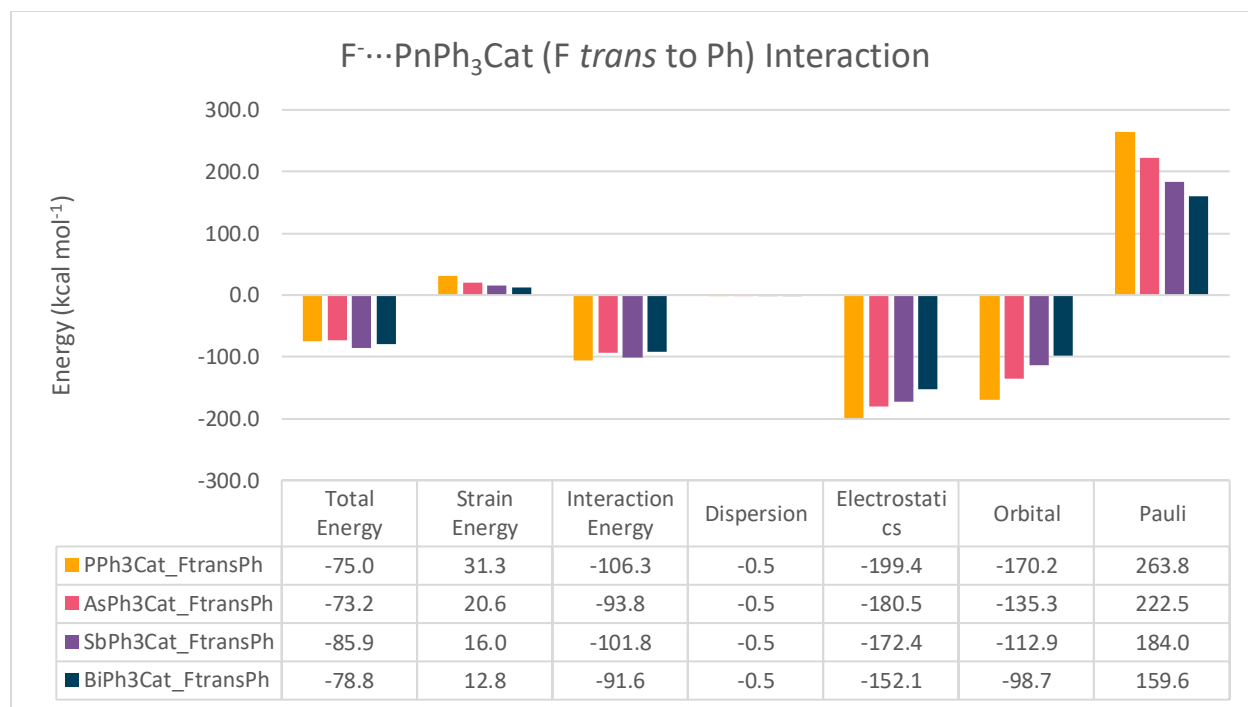

**Graph S7.** Bar graph of F<sup>-</sup>···PnPh<sub>3</sub>Cat (F *trans* to Ph) interaction

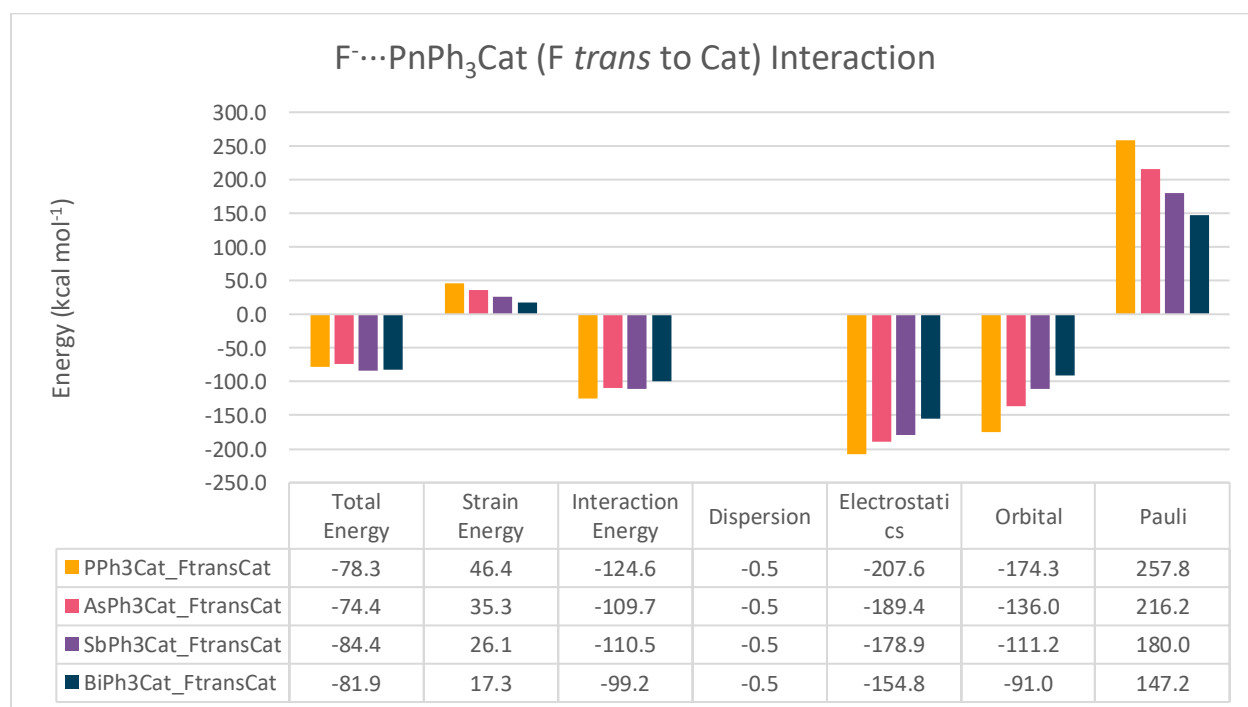

**Graph S8.** Bar graph of F<sup>-</sup>···PnPh<sub>3</sub>Cat (F *trans* to Cat) interaction

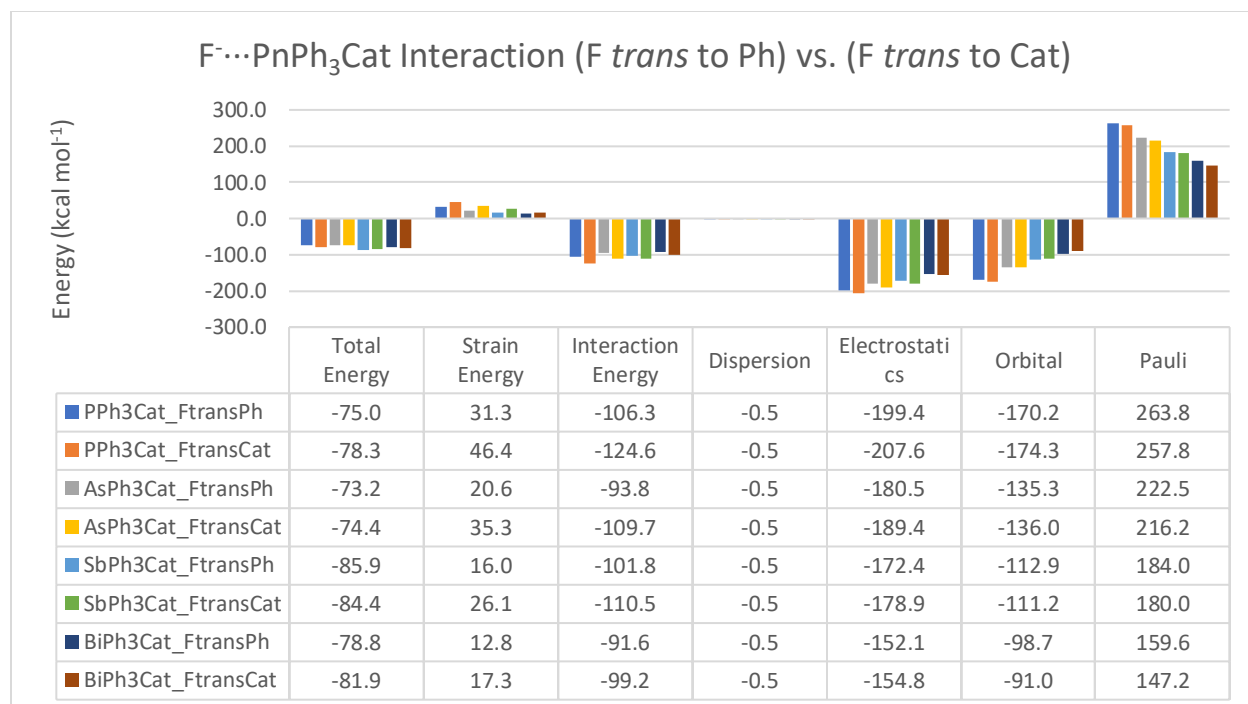

**Graph S9.** Bar graph of F $\cdots$ PnPh<sub>3</sub>Cat (F *trans* to Ph) vs. (F *trans* to Cat) interaction

## XYZ Coordinates of Optimized Geometries

---

**Table S2.** XYZ coordinates of the optimized geometries of  $\text{PnF}_3$  and  $\text{F}^{\cdots}\text{PnF}_3$

|    |                   |                                            |                   |
|----|-------------------|--------------------------------------------|-------------------|
|    |                   | <b><u>PF<sub>3</sub></u></b>               |                   |
| P  | 0.00129099441724  | 0.00000118572170                           | 0.60384033935086  |
| F  | -0.69527993056828 | 1.20060077709404                           | -0.18079210628771 |
| F  | -0.69527528589358 | -1.20059897891080                          | -0.18079263790792 |
| F  | 1.38926422204462  | -0.00000298390493                          | -0.18006259515523 |
|    |                   | <b><u>F<sup>⋯</sup>PF<sub>3</sub></u></b>  |                   |
| P  | 0.48457731287740  | -0.04619422044033                          | -0.00000275616378 |
| F  | -0.58861255447596 | -0.00361133439584                          | -1.24236881320764 |
| F  | -0.58861098211151 | -0.00361210993429                          | 1.24236641223664  |
| F  | 0.26825914129172  | -1.77136231118134                          | 0.00000281939036  |
| F  | 0.40276508241836  | 1.68970897595179                           | 0.00000233774442  |
|    |                   | <b><u>AsF<sub>3</sub></u></b>              |                   |
| As | 0.00015234397849  | -0.00001380837142                          | 0.66222304237706  |
| F  | -0.73911923080124 | 1.27999012433484                           | -0.20246343410982 |
| F  | -0.73915690417673 | -1.28000268099614                          | -0.20245348111071 |
| F  | 1.47812279099948  | 0.00002636503271                           | -0.20237212715654 |
|    |                   | <b><u>F<sup>⋯</sup>AsF<sub>3</sub></u></b> |                   |
| As | 0.53217460172878  | 0.14296521295646                           | 0.00000331931670  |
| F  | 0.09552687192483  | 1.93849738368833                           | -0.00000215570109 |
| F  | -0.58841114735350 | -0.00218785540480                          | 1.34025787296843  |
| F  | -0.58840265082868 | -0.00218632555526                          | -1.34026190035753 |
| F  | 0.55717132452856  | -1.70415041568473                          | 0.00000286377350  |
|    |                   | <b><u>SbF<sub>3</sub></u></b>              |                   |
| Sb | -0.00372321853577 | -0.00000178239726                          | 0.69562345811536  |
| F  | -0.80537544342781 | 1.40843591074175                           | -0.27653896114025 |
| F  | -0.80538087893374 | -1.40843723164639                          | -0.27653553457397 |
| F  | 1.61447954089733  | 0.00000310330190                           | -0.27885796240114 |
|    |                   | <b><u>F<sup>⋯</sup>SbF<sub>3</sub></u></b> |                   |
| Sb | 0.60215443030031  | 0.18343617854963                           | -0.00001222790002 |
| F  | -0.05516990364990 | 2.06034145235068                           | 0.00000320071366  |
| F  | -0.55759349660945 | 0.01881891066084                           | 1.53232771457663  |
| F  | -0.55768054680935 | 0.01878374307145                           | -1.53228150265170 |
| F  | 0.52783351676839  | -1.80957928463259                          | -0.00003718473857 |
|    |                   | <b><u>BiF<sub>3</sub></u></b>              |                   |
| Bi | -0.00429657488197 | -0.00004122599365                          | 0.72153843262038  |
| F  | -0.85151412211108 | 1.49082144778256                           | -0.28507704902422 |
| F  | -0.85167229425317 | -1.49087615866543                          | -0.28500813618708 |
| F  | 1.70748299124622  | 0.00009593687651                           | -0.28776224740908 |
|    |                   | <b><u>F<sup>⋯</sup>BiF<sub>3</sub></u></b> |                   |
| Bi | 0.57612348045270  | 0.18347174758250                           | 0.00010272336195  |
| F  | 0.09146225483070  | 2.24730653547466                           | -0.00005519410119 |
| F  | -0.70942548443278 | -0.01393913887803                          | 1.54680487076245  |
| F  | -0.70931608358020 | -0.01415548547661                          | -1.54664230548915 |
| F  | 0.71069983272958  | -1.93088265870252                          | -0.00021009453406 |



**Table S3.** XYZ coordinates of the optimized geometries of  $PX_5$  and  $F \cdots PX_5$ 

| <u>PF<sub>5</sub></u>                      |                   |                   |                   |
|--------------------------------------------|-------------------|-------------------|-------------------|
| P                                          | 1.42663887440498  | -0.90476074032687 | -0.00000039893666 |
| F                                          | 1.41772827916285  | -0.90476692024430 | 1.59197692559463  |
| F                                          | 0.65842999037402  | 0.46186943505723  | 0.00000341370261  |
| F                                          | 0.65843281861119  | -2.27138670854287 | 0.00000194045459  |
| F                                          | 1.41772116887907  | -0.90476830720182 | -1.59197802829646 |
| F                                          | 2.99247802856788  | -0.90475809874138 | -0.00000385251871 |
| <u>F<math>\cdots</math>PF<sub>5</sub></u>  |                   |                   |                   |
| P                                          | 0.78618592336219  | 0.10922302948850  | -0.43796289451433 |
| F                                          | 0.78618627208429  | -1.52514678429268 | -0.43796320623958 |
| F                                          | -0.84818445917587 | 0.10922290487310  | -0.43796252470802 |
| F                                          | 0.78618604130206  | 0.10922262798939  | -2.07233325400604 |
| F                                          | 2.42055627387329  | 0.10922258888456  | -0.43796309384589 |
| F                                          | 0.78618595600046  | 1.74359331644287  | -0.43796372255263 |
| F                                          | 0.78618592255356  | 0.10922289661425  | 1.19640755586649  |
| <u>PCl<sub>5</sub></u>                     |                   |                   |                   |
| P                                          | 1.43021511331430  | -0.90476185873668 | -0.00000009652209 |
| Cl                                         | 1.43407008703956  | -0.90476220461524 | 2.12557460122581  |
| Cl                                         | 0.40577667664999  | 0.84791776134772  | 0.00000015232013  |
| Cl                                         | 0.40577687175684  | -2.65744145467246 | 0.00000049099057  |
| Cl                                         | 1.43407019618269  | -0.90476209783448 | -2.12557525751508 |
| Cl                                         | 3.46152021505661  | -0.90476148548886 | 0.00000010950066  |
| <u>F<math>\cdots</math>PCl<sub>5</sub></u> |                   |                   |                   |
| P                                          | 0.78618599626684  | 0.10922285607519  | -0.37375585911426 |
| Cl                                         | 0.78618570669689  | -2.04172778657674 | -0.35472515063633 |
| Cl                                         | -1.36476465809129 | 0.10922188709453  | -0.35472579462499 |
| Cl                                         | 0.78618591801185  | 0.10922373528079  | -2.51770448597875 |
| Cl                                         | 2.93713682920443  | 0.10922203837348  | -0.35472573331433 |
| Cl                                         | 0.78618585797507  | 2.26017375820538  | -0.35472495440049 |
| F                                          | 0.78618627993618  | 0.10922409154735  | 1.24462083806917  |
| <u>PBr<sub>5</sub></u>                     |                   |                   |                   |
| P                                          | 1.42987334233928  | -0.90476167272297 | -0.00000073765692 |
| Br                                         | 1.43433151535880  | -0.90475726649502 | 2.33910123747740  |
| Br                                         | 0.31742797765890  | 1.00207197989842  | -0.00000130224920 |
| Br                                         | 0.31743528354454  | -2.81159936196562 | 0.00000114997207  |
| Br                                         | 1.43433055002548  | -0.90475537890306 | -2.33910119258093 |
| Br                                         | 3.63803049107300  | -0.90476963981176 | 0.00000084503758  |
| <u>F<math>\cdots</math>PBr<sub>5</sub></u> |                   |                   |                   |
| P                                          | 0.78618527560387  | 0.10922318552711  | -0.34827376948471 |
| Br                                         | 0.78618649480607  | -2.23975573674192 | -0.32334703704908 |
| Br                                         | -1.56279628571825 | 0.10922079732991  | -0.32334750411045 |
| Br                                         | 0.78618707072253  | 0.10922499852540  | -2.69597822138366 |
| Br                                         | 3.13516765135014  | 0.10922055608330  | -0.32334921625279 |
| Br                                         | 0.78618625346656  | 2.45820249169380  | -0.32334822469897 |
| F                                          | 0.78618546976907  | 0.10922428758239  | 1.27190283297967  |

**Table S4.** XYZ coordinates of the optimized geometries of AsX<sub>5</sub> and F⋯AsX<sub>5</sub>

| <b>AsF<sub>5</sub></b>    |                   |                   |                   |
|---------------------------|-------------------|-------------------|-------------------|
| As                        | 1.42445604071886  | -0.90476076884398 | 0.00000071160198  |
| F                         | 1.40992007196023  | -0.90476116320430 | 1.69938412302489  |
| F                         | 0.61129739280001  | 0.56906749408965  | 0.00000131521106  |
| F                         | 0.61130360998671  | -2.37859222862120 | 0.00000002073304  |
| F                         | 1.40991011625625  | -0.90476240419420 | -1.69938223722324 |
| F                         | 3.10454192827792  | -0.90476226922598 | -0.00000393334772 |
| <b>F⋯AsF<sub>5</sub></b>  |                   |                   |                   |
| As                        | 0.78618583650669  | 0.10922275041536  | -0.43796240311215 |
| F                         | 0.78618646371744  | -1.62924589758054 | -0.43796354319406 |
| F                         | -0.95228230415038 | 0.10922259037704  | -0.43796371103517 |
| F                         | 0.78618476777103  | 0.10922285930471  | -2.17643067421809 |
| F                         | 2.52465400054075  | 0.10922291803083  | -0.43796258350868 |
| F                         | 0.78618679126813  | 1.84769168183031  | -0.43796355985221 |
| F                         | 0.78618637434631  | 0.10922367762227  | 1.30050533492037  |
| <b>AsCl<sub>5</sub></b>   |                   |                   |                   |
| As                        | 1.43129278572986  | -0.90475937858716 | 0.00000317093034  |
| Cl                        | 1.44141176770687  | -0.90476390846608 | 2.20568285250881  |
| Cl                        | 0.34041153932461  | 0.93914863137863  | -0.00000184891635 |
| Cl                        | 0.34041363133151  | -2.74867067320900 | -0.00000148363641 |
| Cl                        | 1.44141137959110  | -0.90476379016741 | -2.20568124659418 |
| Cl                        | 3.57648805631603  | -0.90476222094899 | -0.00000144429221 |
| <b>F⋯AsCl<sub>5</sub></b> |                   |                   |                   |
| As                        | 0.78618497102080  | 0.10922135534855  | -0.38002430496655 |
| Cl                        | 0.78618676771840  | -2.12639862506476 | -0.35502787041181 |
| Cl                        | -1.44943525585493 | 0.10922437569885  | -0.35502806274128 |
| Cl                        | 0.78618612413970  | 0.10922312528318  | -2.62216980934902 |
| Cl                        | 3.02180650892575  | 0.10922430231692  | -0.35502835345152 |
| Cl                        | 0.78618669433236  | 2.34484348877776  | -0.35502828309950 |
| F                         | 0.78618611971790  | 0.10922255763949  | 1.35656554401968  |
| <b>AsBr<sub>5</sub></b>   |                   |                   |                   |
| As                        | 1.43205221739703  | -0.90476274424775 | 0.00000303055804  |
| Br                        | 1.44504438697627  | -0.90475130994894 | 2.40508760631870  |
| Br                        | 0.25133134530817  | 1.08231242191454  | -0.00000270133866 |
| Br                        | 0.25134391597143  | -2.89184375548690 | -0.00000046403380 |
| Br                        | 1.44504311558215  | -0.90474962666026 | -2.40508704893317 |
| Br                        | 3.74661417876494  | -0.90477632557068 | -0.00000042257110 |
| <b>F⋯AsBr<sub>5</sub></b> |                   |                   |                   |
| As                        | 0.78618788465635  | 0.10922161722227  | -0.35542018026224 |
| Br                        | 0.78617986867064  | -2.31644538361236 | -0.32505014607566 |
| Br                        | -1.63948081450785 | 0.10922317475397  | -0.32504520427838 |
| Br                        | 0.78619458324248  | 0.10922623484053  | -2.79548373638645 |
| Br                        | 3.21185151587282  | 0.10922162190442  | -0.32505090011679 |
| Br                        | 0.78617831584554  | 2.53489017521823  | -0.32505321979901 |
| F                         | 0.78619057622003  | 0.10922313967293  | 1.38536224691853  |

**Table S5.** XYZ coordinates of the optimized geometries of  $\text{SbX}_5$  and  $\text{F}\cdots\text{SbX}_5$ 

| <b><u>SbF<sub>5</sub></u></b>                      |                   |                   |                   |
|----------------------------------------------------|-------------------|-------------------|-------------------|
| Sb                                                 | 1.41372620665303  | -0.90479539912986 | -0.00000219180003 |
| F                                                  | 1.34452670438983  | -0.90481752150911 | 1.86368977705243  |
| F                                                  | 0.60178619303405  | 0.76818863237335  | -0.00000030019269 |
| F                                                  | 0.60190306878065  | -2.57753874686088 | -0.00000344503161 |
| F                                                  | 1.34451787964585  | -0.90482045620636 | -1.86367576522974 |
| F                                                  | 3.26496910749658  | -0.90478784866714 | -0.00000807479836 |
| <b><u>F<math>\cdots</math>SbF<sub>5</sub></u></b>  |                   |                   |                   |
| Sb                                                 | 0.78618584671168  | 0.10922307339877  | -0.43791783041300 |
| F                                                  | 0.78618418019346  | -1.79050129537240 | -0.43796313082674 |
| F                                                  | -1.11352842745781 | 0.10922404393207  | -0.43795894073211 |
| F                                                  | 0.78618486967759  | 0.10922397643521  | -2.33765493603092 |
| F                                                  | 2.68590572326880  | 0.10922488140837  | -0.43795961382364 |
| F                                                  | 0.78618501755979  | 2.00894177732802  | -0.43796389680998 |
| F                                                  | 0.78618472004646  | 0.10922412286994  | 1.46167720863639  |
| <b><u>SbCl<sub>5</sub></u></b>                     |                   |                   |                   |
| Sb                                                 | 1.43268931481888  | -0.90476224686000 | -0.00000010675561 |
| Cl                                                 | 1.44961402054102  | -0.90476237902930 | 2.34676544140084  |
| Cl                                                 | 0.24396707757832  | 1.08284252108109  | 0.00000021595279  |
| Cl                                                 | 0.24396502285962  | -2.89236689840557 | 0.00000029615639  |
| Cl                                                 | 1.44961576715993  | -0.90476251160260 | -2.34676418660391 |
| Cl                                                 | 3.75157795704222  | -0.90475982518362 | -0.00000166015050 |
| <b><u>F<math>\cdots</math>SbCl<sub>5</sub></u></b> |                   |                   |                   |
| Sb                                                 | 0.78618587102206  | 0.10922296829149  | -0.38565889998508 |
| Cl                                                 | 0.78618530901978  | -2.26866958715090 | -0.35661791982934 |
| Cl                                                 | -1.59170866412850 | 0.10922160647347  | -0.35662084771820 |
| Cl                                                 | 0.78618794099522  | 0.10922332755693  | -2.77150066898756 |
| Cl                                                 | 3.16407956683629  | 0.10922097498749  | -0.35662216076043 |
| Cl                                                 | 0.78618467753215  | 2.48711649173795  | -0.35661683764913 |
| F                                                  | 0.78618722872299  | 0.10922479810356  | 1.51789619492974  |
| <b><u>SbBr<sub>5</sub></u></b>                     |                   |                   |                   |
| Sb                                                 | 1.43751647048598  | -0.90476215327562 | -0.00000289060464 |
| Br                                                 | 1.47019123949320  | -0.90475715934194 | 2.52427230633977  |
| Br                                                 | 0.13614660480000  | 1.20367268118832  | 0.00000407200166  |
| Br                                                 | 0.13615610116336  | -3.01319837502555 | 0.00000581331369  |
| Br                                                 | 1.47019619535599  | -0.90475589954420 | -2.52427933594309 |
| Br                                                 | 3.92122254870146  | -0.90477043400101 | 0.00000003489262  |
| <b><u>F<math>\cdots</math>SbBr<sub>5</sub></u></b> |                   |                   |                   |
| Sb                                                 | 0.78618668559537  | 0.10922367321217  | -0.35978984773643 |
| Br                                                 | 0.78618665994007  | -2.44337640809276 | -0.33138964803960 |
| Br                                                 | -1.76641420749055 | 0.10922385936373  | -0.33137841126698 |
| Br                                                 | 0.78618251219952  | 0.10921871440203  | -2.93096682710836 |
| Br                                                 | 3.33878989259961  | 0.10922174797980  | -0.33137510626657 |
| Br                                                 | 0.78618454855337  | 2.66182386083558  | -0.33138374781049 |
| F                                                  | 0.78618583860261  | 0.10922513229944  | 1.55054244822843  |

**Table S6.** XYZ coordinates of the optimized geometries of BiX<sub>5</sub> and F<sup>⋯</sup>BiX<sub>5</sub>

| <b>BiF<sub>5</sub></b>               |                   |                   |                   |
|--------------------------------------|-------------------|-------------------|-------------------|
| Bi                                   | 1.41047747357827  | -0.90476940564478 | 0.00000267447925  |
| F                                    | 1.33480189929044  | -0.90475442737025 | 1.96084493722586  |
| F                                    | 0.56510693848334  | 0.86233522211623  | 0.00000996477444  |
| F                                    | 0.56515516527306  | -2.67189956206038 | 0.00001192715142  |
| F                                    | 1.33473531571885  | -0.90475453350818 | -1.96083846731073 |
| F                                    | 3.36115236765603  | -0.90472863353263 | -0.00003103632024 |
| <b>F<sup>⋯</sup>BiF<sub>5</sub></b>  |                   |                   |                   |
| Bi                                   | 0.78612203735485  | 0.10920181700816  | -0.43794763796877 |
| F                                    | 0.78613289968926  | -1.88750554581199 | -0.43787696310028 |
| F                                    | -1.21117311193616 | 0.10920215008559  | -0.43802227814116 |
| F                                    | 0.78611583945745  | 0.10919642889421  | -2.43515764179328 |
| F                                    | 2.78387757125028  | 0.10920071429823  | -0.43804282003703 |
| F                                    | 0.78613146414332  | 2.10607474617834  | -0.43788377195482 |
| F                                    | 0.78609523004097  | 0.10919026934744  | 1.55918997299535  |
| <b>BiCl<sub>5</sub></b>              |                   |                   |                   |
| Bi                                   | 1.43337799464835  | -0.90476139202195 | -0.00000006310413 |
| Cl                                   | 1.45278742477191  | -0.90476373664061 | 2.44487952314358  |
| Cl                                   | 0.18862911672850  | 1.16899072594200  | 0.00000222357904  |
| Cl                                   | 0.18861865967797  | -2.97851665494705 | -0.00000133850966 |
| Cl                                   | 1.45278904810738  | -0.90476695474213 | -2.44487891563301 |
| Cl                                   | 3.85522691606587  | -0.90475332759027 | -0.00000142947582 |
| <b>F<sup>⋯</sup>BiCl<sub>5</sub></b> |                   |                   |                   |
| Bi                                   | 0.78618555288475  | 0.10922276932209  | -0.38709593805397 |
| Cl                                   | 0.78618728258847  | -2.36639247579266 | -0.35390733542283 |
| Cl                                   | -1.68943035190929 | 0.10922478669298  | -0.35390824134996 |
| Cl                                   | 0.78618817242855  | 0.10922366579218  | -2.88019045929467 |
| Cl                                   | 3.26180078301423  | 0.10922173404103  | -0.35391022038866 |
| Cl                                   | 0.78618422993039  | 2.58483766838279  | -0.35390882340285 |
| F                                    | 0.78618626106290  | 0.10922243156158  | 1.61717987791294  |
| <b>BiBr<sub>5</sub></b>              |                   |                   |                   |
| Bi                                   | 1.44149634845089  | -0.90476350867005 | -0.00000080860832 |
| Br                                   | 1.48291656288938  | -0.90474472044601 | 2.61589698163335  |
| Br                                   | 0.06832993178880  | 1.27752928837528  | 0.00000316770323  |
| Br                                   | 0.06832986793258  | -3.08707141580816 | -0.00000130142122 |
| Br                                   | 1.48291674796868  | -0.90474848616544 | -2.61589905550351 |
| Br                                   | 4.02743970096967  | -0.90477249728560 | 0.00000101619647  |
| <b>F<sup>⋯</sup>BiBr<sub>5</sub></b> |                   |                   |                   |
| Bi                                   | 0.78618570725929  | 0.10922223779441  | -0.35702172965328 |
| Br                                   | 0.78618942855809  | -2.53652135175881 | -0.33165197768742 |
| Br                                   | -1.85955685961276 | 0.10922063875877  | -0.33164287613968 |
| Br                                   | 0.78617870484507  | 0.10922382709193  | -3.03610923951076 |
| Br                                   | 3.43192933059302  | 0.10922426627266  | -0.33163778189944 |
| Br                                   | 0.78619305623289  | 2.75496966356190  | -0.33165393327911 |
| F                                    | 0.78618256212439  | 0.10922129827914  | 1.65397639816968  |

**Table S7.** XYZ coordinates of the optimized geometries of PPh<sub>4</sub><sup>+</sup>

|   | <u>PPh<sub>4</sub><sup>+</sup></u> |                   |                   |
|---|------------------------------------|-------------------|-------------------|
| P | 0.89294693826650                   | -0.39757799381801 | 0.00281590346932  |
| C | 1.62433265784658                   | 0.39097214454636  | 1.43985106262458  |
| C | 1.65833384125029                   | -0.30618720116056 | 2.64978082888338  |
| C | 2.12372290233787                   | 1.68818932106991  | 1.36288501445186  |
| C | 2.18480182569839                   | 0.30248600138365  | 3.77562267628930  |
| C | 2.65146270353169                   | 2.28717121698220  | 2.49583957531472  |
| C | 2.68028570369098                   | 1.59773198893269  | 3.69857641349785  |
| C | 1.45318766730233                   | -2.10256068368450 | -0.02997982895884 |
| C | 0.58452032726241                   | -3.13194953174727 | -0.38310122083092 |
| C | 2.78861267144214                   | -2.38042261811623 | 0.26989404220383  |
| C | 1.05584892078019                   | -4.43366321234731 | -0.44724613790009 |
| C | 3.24940326418575                   | -3.68372965468147 | 0.20066735448938  |
| C | 2.38434722761560                   | -4.70834934556677 | -0.16048402806845 |
| C | -0.89806270516551                  | -0.32479229277280 | 0.09594493998496  |
| C | -1.64329684914308                  | -0.57133868584243 | -1.05931782547727 |
| C | -1.54100583083619                  | -0.05017108385327 | 1.29981141178609  |
| C | -3.02570128686887                  | -0.55496745319668 | -0.99990186449199 |
| C | -2.92627169947345                  | -0.03171498910696 | 1.34735361730970  |
| C | -3.66621086578060                  | -0.28643664008487 | 0.20281310071254  |
| C | 1.39363754244013                   | 0.45287920796350  | -1.49637905506858 |
| C | 0.74840749913658                   | 1.64235030597291  | -1.84155271357030 |
| C | 2.43078566651928                   | -0.03848185388698 | -2.28485156004290 |
| C | 1.15169022827643                   | 2.33856019769397  | -2.96766959668777 |
| C | 2.82505376004636                   | 0.66563766256330  | -3.41187118219506 |
| C | 2.19047945174356                   | 1.85144972198961  | -3.75015167453912 |
| H | 1.28707609149444                   | -1.32193634758153 | 2.71472985839886  |
| H | 2.11795173959404                   | 2.22964496447991  | 0.42622476952788  |
| H | 2.21404748539290                   | -0.23630820319065 | 4.71267423031201  |
| H | 3.04590850883505                   | 3.29198202086409  | 2.43549588830196  |
| H | 3.09627359649081                   | 2.06785228182432  | 4.57941088733965  |
| H | -0.45734264060880                  | -2.93130640367244 | -0.59434550276279 |
| H | 3.46626208914374                   | -1.58909852946157 | 0.56685851523837  |
| H | 0.38103434131325                   | -5.23434511630962 | -0.71639644366516 |
| H | 4.28246016670386                   | -3.90060118762718 | 0.43487096338590  |
| H | 2.74658882872567                   | -5.72626377397295 | -0.21013070983944 |
| H | -1.15087426990257                  | -0.76358732671950 | -2.00499134060022 |
| H | -0.97360258968548                  | 0.16350546655188  | 2.19587905907077  |
| H | -3.60346912788365                  | -0.74408608887076 | -1.89406617877075 |
| H | -3.42651087527487                  | 0.18849181374630  | 2.28022367026127  |
| H | -4.74679768506288                  | -0.26798604801038 | 0.24474678427305  |
| H | -0.07162968115057                  | 2.02110320890302  | -1.24361901262313 |
| H | 2.92288893369251                   | -0.96975629236542 | -2.03739616591924 |
| H | 0.65202868343219                   | 3.25863132426881  | -3.23765482522866 |
| H | 3.62651409791781                   | 0.28293055253902  | -4.02839564017453 |
| H | 2.50138906472714                   | 2.39560553537272  | -4.63164071971206 |

**Table S8.** XYZ coordinates of the optimized geometries of F<sup>-</sup>⋯PPh<sub>4</sub><sup>+</sup>

|   | <u>F<sup>-</sup>⋯PPh<sub>4</sub><sup>+</sup></u> |                   |                   |
|---|--------------------------------------------------|-------------------|-------------------|
| P | 0.43039964422011                                 | 0.27044384614292  | 0.12564449947330  |
| F | 0.47917163596598                                 | 0.14497023692357  | -1.59329112988235 |
| C | -0.48025552548080                                | -1.33050032429627 | 0.09779849074646  |
| C | -0.07442850993396                                | -2.37565404866517 | -0.72909050353924 |
| C | -1.60200866605835                                | -1.51104742411680 | 0.90327698508901  |
| C | -0.75491459904771                                | -3.58303771965658 | -0.72215254034402 |
| C | -2.31345479146542                                | -2.70085795604774 | 0.86911934283277  |
| C | -1.88414840071712                                | -3.74534139338965 | 0.06585886358588  |
| C | 0.33711552277141                                 | 0.33298455695834  | 2.03671033944909  |
| C | -0.31473648578703                                | 1.31361735811841  | 2.77655668837822  |
| C | 0.94326888094434                                 | -0.71251758884185 | 2.74050188097410  |
| C | -0.35056756198787                                | 1.26288436730450  | 4.16812269195306  |
| C | 0.91455701917277                                 | -0.76863108331407 | 4.12173366306069  |
| C | 0.26526603078771                                 | 0.22594428402513  | 4.84442713533153  |
| C | -0.49398087542597                                | 1.81881147355230  | -0.15009453277067 |
| C | 0.13573203431845                                 | 3.05021949267649  | -0.01389838096720 |
| C | -1.82876453653583                                | 1.77248280100202  | -0.53567278475427 |
| C | -0.56882970946817                                | 4.22333317645350  | -0.24097960401028 |
| C | -2.53396063646470                                | 2.94713574106317  | -0.74811624970628 |
| C | -1.90628319240426                                | 4.17531183182016  | -0.60286912024621 |
| C | 2.27268692737352                                 | 0.37106545443369  | 0.10807217182185  |
| C | 3.02130478937966                                 | -0.22350018018599 | -0.90916662812631 |
| C | 2.95326031286395                                 | 1.07053208534810  | 1.10512845389024  |
| C | 4.40543994895924                                 | -0.15277134782930 | -0.90303840069646 |
| C | 4.33537719398595                                 | 1.17759864675169  | 1.08563783998764  |
| C | 5.06759136604433                                 | 0.55336125832328  | 0.08897098735760  |
| H | 0.78336375099627                                 | -2.26553277571070 | -1.37536113587569 |
| H | -1.92676979046096                                | -0.72406829241010 | 1.57109474550385  |
| H | -0.40991883201271                                | -4.39365938673493 | -1.35044644522280 |
| H | -3.19518814496506                                | -2.81403840286895 | 1.48579769151485  |
| H | -2.42554636225867                                | -4.68222066298323 | 0.05517156785542  |
| H | -0.80992815528663                                | 2.13759394564821  | 2.28083605159412  |
| H | 1.45222390472797                                 | -1.50157348073905 | 2.19738829780485  |
| H | -0.86456915752876                                | 2.04120947837826  | 4.71777486874826  |
| H | 1.39608373761463                                 | -1.58896765626622 | 4.63837112425996  |
| H | 0.23954847006970                                 | 0.18620127270159  | 5.92570397336912  |
| H | 1.17960743159717                                 | 3.10426580780603  | 0.26889342002595  |
| H | -2.32645789278142                                | 0.82056109442399  | -0.67122338786083 |
| H | -0.06761559983939                                | 5.17668827169874  | -0.13614685483301 |
| H | -3.57488653406938                                | 2.90082734688577  | -1.04014078003406 |
| H | -2.45601089650402                                | 5.09102692238537  | -0.77611061637471 |
| H | 2.53146701929306                                 | -0.74046075184044 | -1.71866845870884 |
| H | 2.40977744473453                                 | 1.54030604452106  | 1.91268860545446  |
| H | 4.96645208421758                                 | -0.63918465328029 | -1.69011664632517 |
| H | 4.83729459012305                                 | 1.74007597134652  | 1.86166716433728  |
| H | 6.14775991632279                                 | 0.61945591248450  | 0.08300188587877  |

**Table S9.** XYZ coordinates of the optimized geometries of AsPh<sub>4</sub><sup>+</sup>

|    | <b>AsPh<sub>4</sub><sup>+</sup></b> |                   |                   |
|----|-------------------------------------|-------------------|-------------------|
| As | 0.89322816778285                    | -0.39655240255249 | -0.00050372966592 |
| C  | 1.65922064274266                    | 0.43864923800959  | 1.52393498853267  |
| C  | 1.71618643804726                    | -0.26412396085842 | 2.72695940384712  |
| C  | 2.13667291971212                    | 1.74263735298333  | 1.43969962400989  |
| C  | 2.24985456396379                    | 0.35033103144731  | 3.84801152736518  |
| C  | 2.66960996647575                    | 2.34574520749096  | 2.56837151516795  |
| C  | 2.72455912936668                    | 1.65243569995719  | 3.76843310801300  |
| C  | 1.48865367277296                    | -2.19930846785789 | -0.04131531235736 |
| C  | 0.61234322116258                    | -3.21641872511112 | -0.40696037934374 |
| C  | 2.81605982652682                    | -2.48339085347064 | 0.27647465357907  |
| C  | 1.07363548409628                    | -4.52234397294576 | -0.46477971008125 |
| C  | 3.26491848120745                    | -3.79262091372386 | 0.21426045336195  |
| C  | 2.39573288602865                    | -4.80867897303250 | -0.15873408681913 |
| C  | -1.00236363774077                   | -0.32952752391539 | 0.09654545778759  |
| C  | -1.74784252719061                   | -0.55809205162338 | -1.05928232504832 |
| C  | -1.63335311959231                   | -0.07509558940990 | 1.30998872791160  |
| C  | -3.13126485737839                   | -0.54111638226256 | -0.99067931862216 |
| C  | -3.01864710586407                   | -0.05741384999163 | 1.36480038665768  |
| C  | -3.76453419771493                   | -0.29270078766132 | 0.21946041472063  |
| C  | 1.42728782902144                    | 0.51147877856508  | -1.58052567852891 |
| C  | 0.77214420674402                    | 1.68993985418350  | -1.93511462177987 |
| C  | 2.47770220349670                    | 0.02164712860593  | -2.35037024354134 |
| C  | 1.18148144024307                    | 2.38189880989150  | -3.06337677621840 |
| C  | 2.87671541334013                    | 0.72280745653028  | -3.47794541336516 |
| C  | 2.23318442538627                    | 1.90003882207124  | -3.83071832122673 |
| H  | 1.36103100867371                    | -1.28558639380150 | 2.79783671633699  |
| H  | 2.11065174522929                    | 2.28884096693421  | 0.50512148384292  |
| H  | 2.29886112373419                    | -0.19020802861694 | 4.78332672862893  |
| H  | 3.04686639689115                    | 3.35717979160685  | 2.50726883500159  |
| H  | 3.14421133023029                    | 2.12640980560986  | 4.64542998992444  |
| H  | -0.42562363094895                   | -3.00768226222187 | -0.63373436057674 |
| H  | 3.49960972553952                    | -1.70029306894372 | 0.58293669472690  |
| H  | 0.39626204064638                    | -5.31729207880934 | -0.74462196875653 |
| H  | 4.29267048989302                    | -4.01946536405150 | 0.46230032624571  |
| H  | 2.74939005682121                    | -5.82980265433584 | -0.20357806599534 |
| H  | -1.26383358907139                   | -0.73665545228450 | -2.01240486267130 |
| H  | -1.06168134126162                   | 0.12172442004535  | 2.20829682919131  |
| H  | -3.71456728179747                   | -0.71616343026670 | -1.88419929610657 |
| H  | -3.51453837470687                   | 0.14539090959241  | 2.30402342599075  |
| H  | -4.84484853738448                   | -0.27576172514770 | 0.26790713524957  |
| H  | -0.05799088892876                   | 2.06816786173431  | -1.35020102354290 |
| H  | 2.97886909913952                    | -0.90256943335409 | -2.09091584600953 |
| H  | 0.67654464268862                    | 3.29567023784172  | -3.34494517668227 |
| H  | 3.68972172380280                    | 0.34553153300685  | -4.08272442274338 |
| H  | 2.54871878817339                    | 2.44186944014310  | -4.71194748641057 |

**Table S10.** XYZ coordinates of the optimized geometries of F<sup>-</sup>⋯AsPh<sub>4</sub><sup>+</sup>

|    | <b>F<sup>-</sup>⋯AsPh<sub>4</sub><sup>+</sup></b> |                   |                   |
|----|---------------------------------------------------|-------------------|-------------------|
| As | 0.43867774261091                                  | 0.24463289569463  | 0.13702413915519  |
| F  | 0.49379562711073                                  | 0.09157461283060  | -1.70793658098090 |
| C  | -0.53339705900547                                 | -1.43619858165259 | 0.09300351276138  |
| C  | -0.22761324983728                                 | -2.42079434219850 | -0.84318315241929 |
| C  | -1.56603175670153                                 | -1.65774264295840 | 0.99961211607244  |
| C  | -0.92262068339603                                 | -3.62027154813054 | -0.84452670508398 |
| C  | -2.28784289307182                                 | -2.84236298797943 | 0.96569365905557  |
| C  | -1.95981617353740                                 | -3.83075537442540 | 0.05174524208653  |
| C  | 0.34351084126905                                  | 0.33198918399235  | 2.14946766053943  |
| C  | -0.33954984875030                                 | 1.31179678201860  | 2.86113167884850  |
| C  | 0.96567509605356                                  | -0.68971901666133 | 2.87022410132965  |
| C  | -0.38934424175215                                 | 1.28294634986286  | 4.25228528511861  |
| C  | 0.92010694669954                                  | -0.72379450211233 | 4.25342566853529  |
| C  | 0.24133890936253                                  | 0.26832311133815  | 4.95076885880537  |
| C  | -0.52609742622286                                 | 1.87574617205314  | -0.18679619064425 |
| C  | 0.07033341246612                                  | 3.10281743802448  | 0.07627874085201  |
| C  | -1.81221110758357                                 | 1.83016488174719  | -0.71009658763599 |
| C  | -0.62251589905176                                 | 4.27873365304469  | -0.17326543747177 |
| C  | -2.50684293436122                                 | 3.00764340766534  | -0.94332344555699 |
| C  | -1.91298360142935                                 | 4.23289367069265  | -0.67829000777665 |
| C  | 2.37771674691495                                  | 0.36581342333432  | 0.09363386648737  |
| C  | 3.11038774172450                                  | -0.16620008211471 | -0.96582558593499 |
| C  | 3.05467040482627                                  | 1.01940221867289  | 1.12104760795674  |
| C  | 4.49360106401408                                  | -0.07181174580381 | -0.97487189290348 |
| C  | 4.43629436472628                                  | 1.14128487147973  | 1.09019230120107  |
| C  | 5.16004054310731                                  | 0.58583559154373  | 0.04777207030406  |
| H  | 0.54978186939768                                  | -2.26341509646065 | -1.57489993578186 |
| H  | -1.81755988608462                                 | -0.91334482739374 | 1.74354234264397  |
| H  | -0.66099516388619                                 | -4.38672453668311 | -1.56219683181193 |
| H  | -3.1000608566279                                  | -2.99345049094485 | 1.66440714412287  |
| H  | -2.51052801979127                                 | -4.76219123549992 | 0.03684720889447  |
| H  | -0.84891615312134                                 | 2.11393792730570  | 2.34284125490818  |
| H  | 1.49918454764070                                  | -1.47691901548863 | 2.34769512777796  |
| H  | -0.92579893097031                                 | 2.05762565016113  | 4.78536343715902  |
| H  | 1.41250002703481                                  | -1.52468580898447 | 4.78999491235908  |
| H  | 0.20370122851259                                  | 0.24504084503389  | 6.03217073314715  |
| H  | 1.07689934240438                                  | 3.15567456220163  | 0.47415549551744  |
| H  | -2.27987345309406                                 | 0.88109055125451  | -0.94107058293251 |
| H  | -0.15031889168798                                 | 5.23166487557063  | 0.02676439571706  |
| H  | -3.51078013407283                                 | 2.96692052243338  | -1.34495383151599 |
| H  | -2.45369174735883                                 | 5.15053146353758  | -0.86907639820846 |
| H  | 2.60878249873422                                  | -0.64485144181278 | -1.79178045468029 |
| H  | 2.51612021554281                                  | 1.43816213898416  | 1.96003650920003  |
| H  | 5.05087229999108                                  | -0.50327858217429 | -1.79598454428336 |
| H  | 4.94383599920621                                  | 1.66397354804417  | 1.89014282244018  |
| H  | 6.23901787108059                                  | 0.66764151095727  | 0.03016027262599  |



**Table S11.** XYZ coordinates of the optimized geometries of SbPh<sub>4</sub><sup>+</sup>

|    | <b>SbPh<sub>4</sub><sup>+</sup></b> |                   |                   |
|----|-------------------------------------|-------------------|-------------------|
| Sb | 0.89839901709850                    | -0.38890089720279 | -0.00857202079164 |
| C  | 1.74701209495753                    | 0.52540396545313  | 1.67150386069375  |
| C  | 1.84628000921574                    | -0.19426319793559 | 2.85992149901183  |
| C  | 2.18895883323555                    | 1.84203630529708  | 1.59437585207974  |
| C  | 2.39186205955796                    | 0.41676111556345  | 3.97860506880831  |
| C  | 2.73241509158859                    | 2.44147452619636  | 2.72031964851442  |
| C  | 2.83196734038126                    | 1.73086557670327  | 3.90792177922892  |
| C  | 1.54871012284523                    | -2.37673578560430 | -0.04630459902953 |
| C  | 0.67517852171788                    | -3.37783988408179 | -0.45940686569441 |
| C  | 2.85299758974677                    | -2.67879973974291 | 0.33676043724064  |
| C  | 1.11822271384804                    | -4.69104369307980 | -0.49539704194778 |
| C  | 3.28339391363707                    | -3.99639693726258 | 0.29735917708297  |
| C  | 2.41819907421949                    | -4.99780169271020 | -0.12021750448304 |
| C  | -1.19042779176829                   | -0.32161157519585 | 0.09812496328197  |
| C  | -1.93707336336006                   | -0.51729057146961 | -1.06102626807457 |
| C  | -1.81462657631695                   | -0.10801112119538 | 1.32276804728740  |
| C  | -3.32153037603222                   | -0.50457004489680 | -0.98593823139253 |
| C  | -3.19994521370260                   | -0.09450742061023 | 1.38375915301787  |
| C  | -3.94961201959957                   | -0.29529674602634 | 0.23368121094376  |
| C  | 1.48097823682132                    | 0.61446298068966  | -1.74981012037524 |
| C  | 0.79588295691453                    | 1.76721103889028  | -2.12560206902067 |
| C  | 2.55825141024788                    | 0.14643354387956  | -2.49533922879929 |
| C  | 1.20068194460047                    | 2.45719253945359  | -3.25817197602221 |
| C  | 2.95243217875015                    | 0.84529899972786  | -3.62638482829293 |
| C  | 2.27759284605164                    | 1.99788611773719  | -4.00331919100811 |
| H  | 1.51643774487627                    | -1.22456312263954 | 2.92496538908911  |
| H  | 2.12748707944854                    | 2.40196419905840  | 0.66901868483026  |
| H  | 2.47464310640069                    | -0.13551442261071 | 4.90479288978504  |
| H  | 3.08165780555541                    | 3.46351764042772  | 2.66769455097688  |
| H  | 3.25876960123096                    | 2.20244270649312  | 4.78275708684643  |
| H  | -0.34668141462492                   | -3.15236420541585 | -0.73985803922975 |
| H  | 3.53388471580913                    | -1.90735467668990 | 0.67664367621526  |
| H  | 0.44464518885098                    | -5.47548504556650 | -0.81210209345489 |
| H  | 4.29360816110228                    | -4.24014336139479 | 0.59665402670075  |
| H  | 2.75733205609161                    | -6.02446707495766 | -0.14740642368400 |
| H  | -1.45814973629949                   | -0.66700965214150 | -2.02168415266888 |
| H  | -1.23930568896179                   | 0.05899687774236  | 2.22546596735749  |
| H  | -3.90878464922506                   | -0.65434796672298 | -1.88160328303065 |
| H  | -3.69314317666942                   | 0.07571257632092  | 2.33099670090489  |
| H  | -5.02976110475543                   | -0.28325751423582 | 0.28721359848222  |
| H  | -0.05337241547489                   | 2.12896308302772  | -1.55783158912634 |
| H  | 3.08564936855637                    | -0.75745852054602 | -2.21500892724147 |
| H  | 0.67348345062887                    | 3.35232575066146  | -3.55852974926444 |
| H  | 3.78676900904009                    | 0.48708050715013  | -4.21367046758936 |
| H  | 2.59014028376388                    | 2.53853481946219  | -4.88630859815818 |

**Table S12.** XYZ coordinates of the optimized geometries of F<sup>-</sup>...SbPh<sub>4</sub><sup>+</sup>

|    | <b>F<sup>-</sup>...SbPh<sub>4</sub><sup>+</sup></b> |                   |                   |
|----|-----------------------------------------------------|-------------------|-------------------|
| Sb | 0.41054449861346                                    | 0.20536715013113  | 0.11673831521516  |
| F  | 0.44800276860880                                    | -0.03073159898261 | -1.86873452369355 |
| C  | -0.63988045332311                                   | -1.65466000182094 | 0.12195592082128  |
| C  | -0.56327183649278                                   | -2.51666307625672 | -0.96936053016699 |
| C  | -1.42271217141639                                   | -2.00216282610437 | 1.21853628291204  |
| C  | -1.24716292960873                                   | -3.72336465439541 | -0.94695600344095 |
| C  | -2.12320000928839                                   | -3.20060663128280 | 1.22436254259011  |
| C  | -2.03067958313319                                   | -4.06525538057710 | 0.14539157374986  |
| C  | 0.31854979835542                                    | 0.36805627414026  | 2.30415436998604  |
| C  | -0.52740904553567                                   | 1.24797553011517  | 2.97236283649888  |
| C  | 1.06834844658167                                    | -0.53042466261386 | 3.06417044036220  |
| C  | -0.60913002861257                                   | 1.24521388286928  | 4.36090246344574  |
| C  | 0.99003985849978                                    | -0.53897895866044 | 4.44836922221994  |
| C  | 0.15107889775151                                    | 0.35439423510533  | 5.10104794490318  |
| C  | -0.57951549798822                                   | 2.03562804554140  | -0.27799391358391 |
| C  | -0.12544594935530                                   | 3.20658484331107  | 0.31823704994325  |
| C  | -1.66252476242724                                   | 2.07786051589040  | -1.14797463538025 |
| C  | -0.76294771728381                                   | 4.41193108901941  | 0.05985848833860  |
| C  | -2.30849339036058                                   | 3.28165233339763  | -1.38959854263282 |
| C  | -1.86066428225665                                   | 4.44801945223548  | -0.78657284113459 |
| C  | 2.53359231269908                                    | 0.32755379753364  | 0.03700225580138  |
| C  | 3.22966159506177                                    | -0.13447684985121 | -1.07621509449034 |
| C  | 3.22927285167231                                    | 0.93053847279262  | 1.08058957027497  |
| C  | 4.61119970612134                                    | -0.01865544559518 | -1.12522911296584 |
| C  | 4.60953086007688                                    | 1.06220540472849  | 1.01682644550807  |
| C  | 5.30218436597292                                    | 0.58142115197939  | -0.08301075382678 |
| H  | 0.01785534510406                                    | -2.24800931084589 | -1.83783219324322 |
| H  | -1.49546492684632                                   | -1.34934817818898 | 2.07782755930237  |
| H  | -1.17194911948620                                   | -4.39470574720686 | -1.79248126259964 |
| H  | -2.73971321777952                                   | -3.45592937305314 | 2.07624868478489  |
| H  | -2.56997450253208                                   | -5.00353706683876 | 0.15411939635248  |
| H  | -1.14177527724703                                   | 1.94708297203071  | 2.41803235960864  |
| H  | 1.72753379871092                                    | -1.24088304284240 | 2.57642059210079  |
| H  | -1.27172150978665                                   | 1.93993827823998  | 4.86140779259538  |
| H  | 1.58316819326744                                    | -1.24295466859722 | 5.01803205191720  |
| H  | 0.08769563148905                                    | 0.35076347017127  | 6.18148730652597  |
| H  | 0.72814083725092                                    | 3.19433832348753  | 0.98641392208616  |
| H  | -2.00398807401866                                   | 1.18033714577475  | -1.64626739295097 |
| H  | -0.40065219588830                                   | 5.32140754507058  | 0.52109827355497  |
| H  | -3.15762624257867                                   | 3.30967661255627  | -2.05983045128324 |
| H  | -2.36267593583206                                   | 5.38654254441874  | -0.98190624326114 |
| H  | 2.69869429563379                                    | -0.57085272239082 | -1.90885057830148 |
| H  | 2.70721398529313                                    | 1.29675518028666  | 1.95486314186039  |
| H  | 5.14801308768435                                    | -0.39077382707662 | -1.98809106051173 |
| H  | 5.14059389112342                                    | 1.54003269178569  | 1.82973016145828  |
| H  | 6.37917363350608                                    | 0.67704708056842  | -0.12993183125079 |

**Table S13.** XYZ coordinates of the optimized geometries of BiPh<sub>4</sub><sup>+</sup>

| <b>BiPh<sub>4</sub><sup>+</sup></b> |                   |                   |                   |
|-------------------------------------|-------------------|-------------------|-------------------|
| Bi                                  | 0.89997210426634  | -0.38066129856530 | -0.02035573971165 |
| C                                   | 1.79427239706824  | 0.56324743453209  | 1.73965889974918  |
| C                                   | 1.88486396698463  | -0.16813513518043 | 2.91721959352585  |
| C                                   | 2.25329108641381  | 1.86998777540719  | 1.65592448910928  |
| C                                   | 2.44815834207319  | 0.43118678407329  | 4.03501657745323  |
| C                                   | 2.81381908757404  | 2.45522109268979  | 2.78232033615293  |
| C                                   | 2.90915872814646  | 1.73800866031914  | 3.96639252580345  |
| C                                   | 1.57936501530633  | -2.46024586258308 | -0.04538703793477 |
| C                                   | 0.70615195623928  | -3.45047229641758 | -0.47409132908183 |
| C                                   | 2.86719289095386  | -2.75795676018447 | 0.38021289461111  |
| C                                   | 1.14108982855844  | -4.76789389421071 | -0.48210140092554 |
| C                                   | 3.28709467039905  | -4.08087978059749 | 0.36773369991332  |
| C                                   | 2.42683170085468  | -5.08003835909793 | -0.06425097161093 |
| C                                   | -1.28577214164033 | -0.32441216643547 | 0.08828694945611  |
| C                                   | -2.02056125027244 | -0.51845339793831 | -1.07407798457320 |
| C                                   | -1.90219230188271 | -0.11800614115032 | 1.31436315857017  |
| C                                   | -3.40642569722599 | -0.50970656436007 | -0.99910835448443 |
| C                                   | -3.28870314280131 | -0.10926481401766 | 1.37246995024872  |
| C                                   | -4.03626108572404 | -0.30737596209464 | 0.22043100184309  |
| C                                   | 1.50244379422989  | 0.68117176369513  | -1.83682370698529 |
| C                                   | 0.79090013536177  | 1.81414550251840  | -2.20897757653567 |
| C                                   | 2.59098167661499  | 0.22817332150885  | -2.56891140476042 |
| C                                   | 1.18654842245596  | 2.50942485545151  | -3.34316858661693 |
| C                                   | 2.97370204241846  | 0.93414670097251  | -3.70079909628711 |
| C                                   | 2.27563872243117  | 2.07125163907858  | -4.08285927034461 |
| H                                   | 1.53754224325997  | -1.19269229240065 | 2.97820353505794  |
| H                                   | 2.19182238211505  | 2.43322146411116  | 0.73274575847617  |
| H                                   | 2.52694360399956  | -0.12599530497958 | 4.95872710671033  |
| H                                   | 3.17851918735393  | 3.47205124507746  | 2.73172391185308  |
| H                                   | 3.34830905159193  | 2.19931240378813  | 4.84051168947423  |
| H                                   | -0.30441275917788 | -3.21858211921630 | -0.78788372324008 |
| H                                   | 3.54214418438965  | -1.98634991817761 | 0.73054366000566  |
| H                                   | 0.47124029107143  | -5.55064552342786 | -0.81101859363802 |
| H                                   | 4.28626333003356  | -4.32874194011893 | 0.69932277675333  |
| H                                   | 2.75844471633811  | -6.10943656682774 | -0.07008621420950 |
| H                                   | -1.53817992551628 | -0.66417295487470 | -2.03331627512209 |
| H                                   | -1.32685048603878 | 0.04523320681159  | 2.21759459067287  |
| H                                   | -3.99203729257758 | -0.65838036133270 | -1.89614534985774 |
| H                                   | -3.78356142405987 | 0.05451192922986  | 2.32009258204771  |
| H                                   | -5.11643371793257 | -0.29954359231982 | 0.27289962661984  |
| H                                   | -0.06646125311832 | 2.15791474414713  | -1.64276501529637 |
| H                                   | 3.13596796835401  | -0.66297089797046 | -2.28219202492005 |
| H                                   | 0.64193918907620  | 3.39294332863913  | -3.64712547226140 |
| H                                   | 3.81827473811068  | 0.59271846482278  | -4.28362330726331 |
| H                                   | 2.58047502392338  | 2.61667158760605  | -4.96551687844670 |

**Table S14.** XYZ coordinates of the optimized geometries of F<sup>-</sup>...BiPh<sub>4</sub><sup>+</sup>

|    | <b>F...BiPh<sub>4</sub><sup>+</sup></b> |                   |                   |
|----|-----------------------------------------|-------------------|-------------------|
| Bi | 0.37945742373251                        | 0.21553390232138  | 0.13938957606120  |
| F  | 0.40963540193419                        | -0.03765387739266 | -1.97702680921932 |
| C  | -0.70116595231773                       | -1.73217120565196 | 0.12522385073282  |
| C  | -0.96309363236097                       | -2.37619173587693 | -1.07670941371757 |
| C  | -1.09780078075638                       | -2.28890720242930 | 1.33207213947180  |
| C  | -1.62824566095350                       | -3.59460176316909 | -1.05916633412169 |
| C  | -1.76212592784102                       | -3.50877148183005 | 1.33623914595970  |
| C  | -2.02722930172844                       | -4.16144648885752 | 0.14254872005012  |
| C  | 0.28720167143895                        | 0.40903542201735  | 2.43335496813386  |
| C  | -0.80889650470108                       | 1.00404029606909  | 3.05105585851505  |
| C  | 1.25433371554785                        | -0.19659800686101 | 3.23071270089607  |
| C  | -0.92299234981410                       | 1.01977272393486  | 4.43588602541047  |
| C  | 1.14427793739488                        | -0.18394231389929 | 4.61562758307663  |
| C  | 0.05696530427037                        | 0.42950805540544  | 5.22016210106401  |
| C  | -0.60290192610198                       | 2.15078881904359  | -0.29443749255811 |
| C  | -0.43029249747755                       | 3.20499903913812  | 0.59103202119882  |
| C  | -1.33309653681566                       | 2.31698719551146  | -1.46221275794299 |
| C  | -1.00928863130875                       | 4.43641594899392  | 0.31328852157774  |
| C  | -1.92241430336267                       | 3.54642288705635  | -1.72274626431388 |
| C  | -1.76104106787908                       | 4.60423061094130  | -0.83936730288648 |
| C  | 2.58570536654584                        | 0.28578196050332  | -0.00455915872955 |
| C  | 3.23297296644029                        | -0.36971778581939 | -1.04220981237686 |
| C  | 3.30292172259511                        | 1.02505938759812  | 0.92500426849222  |
| C  | 4.61730353353620                        | -0.30946892317104 | -1.12261174899150 |
| C  | 4.68674230938409                        | 1.09153065057449  | 0.82824150699067  |
| C  | 5.34328434571379                        | 0.41867172249679  | -0.19097042322534 |
| H  | -0.65047579483967                       | -1.93187528152272 | -2.00920179088593 |
| H  | -0.89847385833383                       | -1.79012478533207 | 2.27101461017358  |
| H  | -1.83515399106511                       | -4.10102502820105 | -1.99307852704745 |
| H  | -2.07166574664780                       | -3.94498637314831 | 2.27699167404401  |
| H  | -2.54595938310143                       | -5.11119879320322 | 0.14810661281159  |
| H  | -1.59270944452366                       | 1.46259945683617  | 2.45812965659083  |
| H  | 2.10751169470150                        | -0.69174755267660 | 2.78056238654378  |
| H  | -1.77996532280229                       | 1.49064578065052  | 4.90072713648546  |
| H  | 1.90739529530560                        | -0.65626715961716 | 5.22116616999882  |
| H  | -0.02985212040281                       | 0.44197276171957  | 6.29887293885851  |
| H  | 0.14961912982500                        | 3.08275092093567  | 1.49771198065444  |
| H  | -1.42730385251189                       | 1.50647241942365  | -2.16998669265498 |
| H  | -0.87027700878816                       | 5.26176024941819  | 0.99938086529848  |
| H  | -2.50065593380301                       | 3.68023262347372  | -2.62770212598373 |
| H  | -2.21702879606867                       | 5.56214262651122  | -1.05270020501524 |
| H  | 2.66666679169777                        | -0.90686379206575 | -1.78921061524755 |
| H  | 2.80086559647418                        | 1.54996467496590  | 1.72858789046383  |
| H  | 5.12869169943478                        | -0.82507950958832 | -1.92495128934260 |
| H  | 5.24810138962534                        | 1.67055888185217  | 1.54991426300389  |
| H  | 6.42196303070892                        | 0.46611004292105  | -0.26280640829771 |

**Table S15.** XYZ coordinates of the optimized geometry of PPh<sub>3</sub>Cat

| <b>PPh<sub>3</sub>Cat</b> |                   |                   |                   |
|---------------------------|-------------------|-------------------|-------------------|
| P                         | 1.23961295742041  | -0.09673264491064 | -0.02145459101928 |
| Cl                        | -4.92934223675833 | 2.06817222190244  | 0.08360386585597  |
| Cl                        | -2.02058793139983 | 3.27778198352369  | -0.01013191587537 |
| Cl                        | -2.77948835166004 | -2.90563704238768 | 0.01951319512462  |
| Cl                        | -5.29909629770615 | -1.02529519085925 | 0.09170522586872  |
| O                         | -0.20459075256792 | -1.27161810632155 | -0.08563539977850 |
| O                         | 0.08177995059606  | 1.10902252354390  | -0.09042733304427 |
| C                         | 2.58056775992750  | 1.20770915630541  | -0.05154663235556 |
| C                         | -1.21145531688217 | 0.73124334933534  | -0.04548954091722 |
| C                         | 1.69147447835835  | -0.82495820034980 | 1.59745216040078  |
| C                         | -1.35371418042630 | -0.64807152949008 | -0.04038360845072 |
| C                         | -3.72785487012297 | -0.34983553733358 | 0.04132905599256  |
| C                         | -2.61893918503887 | -1.20285703139969 | 0.00667598151359  |
| C                         | 2.38054274838494  | 2.58326595198564  | 0.02758300354099  |
| C                         | -3.56705555277335 | 1.03230151168019  | 0.03650580940115  |
| C                         | -2.28146362242230 | 1.58687159511385  | -0.00564657473508 |
| C                         | 3.89219373250897  | 0.73429566652957  | -0.13147323763499 |
| C                         | 1.79964237903117  | -0.91962252575808 | -1.55061649451793 |
| C                         | 1.99692573426477  | -2.29448139193813 | -1.63710888438462 |
| C                         | 1.43034256262910  | -2.16094569720847 | 1.91580355780978  |
| C                         | 2.27851837042613  | -0.01185488671164 | 2.56731400265057  |
| C                         | 1.99239550211107  | -0.12868758630204 | -2.67924267143312 |
| C                         | 3.46300472978674  | 3.45657735034195  | 0.02579003023771  |
| C                         | 1.79426080534348  | -2.67332184778689 | 3.14966144413912  |
| C                         | 2.37715953340953  | -1.85466748906909 | 4.10507364587095  |
| C                         | 4.75684884010790  | 2.97159671206654  | -0.04971585668450 |
| C                         | 4.96971018079998  | 1.60145127720363  | -0.12732821300097 |
| C                         | 2.60340483805760  | -0.51936342775097 | 3.81555123615738  |
| C                         | 2.36742719294768  | -0.70703813742820 | -3.88191321037122 |
| C                         | 2.40726774091558  | -2.86354955109464 | -2.83158166034062 |
| C                         | 2.58467997192897  | -2.07374840116569 | -3.95795972889208 |
| H                         | 1.38388307123191  | 2.99435035904385  | 0.09387684043812  |
| H                         | 4.08225140767730  | -0.33117300785620 | -0.19372332551645 |
| H                         | 1.84880205165018  | -2.93125575870888 | -0.77683670338761 |
| H                         | 0.92756398701988  | -2.80942802240956 | 1.21560870199146  |
| H                         | 2.48499074875464  | 1.02843159979827  | 2.36072170370416  |
| H                         | 1.85860990895367  | 0.94437703840153  | -2.62563841113057 |
| H                         | 3.28597498335817  | 4.52254206100819  | 0.08530274012107  |
| H                         | 1.60208366969235  | -3.71486526393190 | 3.36965118754878  |
| H                         | 2.64618477992251  | -2.25499778741343 | 5.07368423313177  |
| H                         | 5.59675319152920  | 3.65393499573984  | -0.04912942608926 |
| H                         | 5.97610856192551  | 1.20849792439402  | -0.18713632694391 |
| H                         | 3.04204051805448  | 0.13361779656745  | 4.55785017196499  |
| H                         | 2.50032576250147  | -0.08445849442802 | -4.75640089037935 |
| H                         | 2.57763027305870  | -3.93057479132211 | -2.88393683033258 |
| H                         | 2.89276237347231  | -2.52354772314913 | -4.89249332624848 |

**Table S16.** XYZ coordinates of the optimized geometry of F $\cdots$ PPh<sub>3</sub>Cat (F *trans* to Ph)

| <b>F<math>\cdots</math>PPh<sub>3</sub>Cat (F <i>trans</i> to Ph)</b> |                   |                   |                   |
|----------------------------------------------------------------------|-------------------|-------------------|-------------------|
| P                                                                    | 0.03271432736720  | -0.06835557225751 | 0.02684067747881  |
| Cl                                                                   | -0.00008014372395 | 0.25802915230792  | 4.83483517411384  |
| Cl                                                                   | 2.91009883584277  | -0.09338547668006 | 5.97056760516574  |
| Cl                                                                   | 5.27679117375000  | -0.64420709731532 | 4.00476965227874  |
| Cl                                                                   | 4.71215812936964  | -0.85052354921895 | 0.91558961456216  |
| F                                                                    | 0.51093744766415  | 1.54169755634961  | 0.13808658318099  |
| O                                                                    | -0.07450873307152 | -0.00513186086901 | 1.84035564736728  |
| O                                                                    | 1.80373080696798  | -0.45721876694759 | 0.28331541881077  |
| C                                                                    | -2.15576052025174 | 1.74272339588562  | 0.36736367764194  |
| C                                                                    | -1.78111497097299 | 0.45531520258622  | -0.02518584145515 |
| C                                                                    | -2.80469489112254 | -0.39130446500131 | -0.45141331072559 |
| C                                                                    | -4.12706058156376 | 0.02768119211365  | -0.51640775370932 |
| C                                                                    | -4.47216211009963 | 1.31224081682306  | -0.13365419135867 |
| C                                                                    | -3.47578443023538 | 2.16444167183029  | 0.31674835003312  |
| C                                                                    | 0.36092191511469  | 0.02672147623039  | -1.82878179071078 |
| C                                                                    | 1.49962324848288  | 0.66856076262561  | -2.31855056457955 |
| C                                                                    | 1.73958832112577  | 0.77627576644409  | -3.68071579374092 |
| C                                                                    | 0.84075160794897  | 0.25497159998799  | -4.59902801871913 |
| C                                                                    | -0.29567820263089 | -0.38500428620344 | -4.13309546258731 |
| C                                                                    | -0.52439012740554 | -0.49497791685119 | -2.76840539145035 |
| C                                                                    | 2.15476744968250  | -0.38875277121236 | 1.53983841805145  |
| C                                                                    | 3.43639589243278  | -0.54394139618780 | 2.02716259596377  |
| C                                                                    | 3.67448435495518  | -0.45285321142891 | 3.40608551498550  |
| C                                                                    | 2.62701631129234  | -0.20623164336768 | 4.27631346099496  |
| C                                                                    | 1.32453243895085  | -0.04566125575357 | 3.78127470834249  |
| C                                                                    | 1.09007474277924  | -0.13407015275864 | 2.42489365518035  |
| C                                                                    | -0.63211048540503 | -4.72909517717311 | 0.24873638218058  |
| C                                                                    | 0.20903238333034  | -4.18087116529920 | -0.70706845334169 |
| C                                                                    | 0.38749635719275  | -2.80614772594299 | -0.77753429624872 |
| C                                                                    | -0.27504080474553 | -1.93941565497031 | 0.09042915594626  |
| C                                                                    | -1.09740165984123 | -2.51224795510643 | 1.06156390434312  |
| C                                                                    | -1.28224101888941 | -3.88572382256252 | 1.13618768690144  |
| H                                                                    | -1.40808643053327 | 2.43327940558082  | 0.72393655063230  |
| H                                                                    | -2.58630676340360 | -1.41163405523793 | -0.73450661023519 |
| H                                                                    | -4.88744103122012 | -0.66225755515882 | -0.86148131202237 |
| H                                                                    | -5.50240571619600 | 1.64337934562522  | -0.17962562534858 |
| H                                                                    | -3.72400284315626 | 3.17066984565329  | 0.63216953246408  |
| H                                                                    | 2.22457983701378  | 1.08086657961478  | -1.63246857293643 |
| H                                                                    | 2.63668946872308  | 1.27680682729112  | -4.02461961027795 |
| H                                                                    | 1.02554114183923  | 0.34389509388846  | -5.66261110825214 |
| H                                                                    | -1.01159424873049 | -0.80372492185452 | -4.82978387526332 |
| H                                                                    | -1.41655726132740 | -1.01054780319585 | -2.44480962292601 |
| H                                                                    | -0.77240114818898 | -5.80151968510086 | 0.30731589611622  |
| H                                                                    | 0.73972441026022  | -4.82406222447387 | -1.39850247238537 |
| H                                                                    | 1.06175039774955  | -2.41031717099971 | -1.52509234112307 |
| H                                                                    | -1.61334869486972 | -1.87956442073017 | 1.77092077574250  |
| H                                                                    | -1.93238818225092 | -4.29551693097844 | 1.89956138091924  |

**Table S17.** XYZ coordinates of the optimized geometry of F $\cdots$ PPh<sub>3</sub>Cat (F *trans* to Cat)

| <b>F<math>\cdots</math>PPh<sub>3</sub>Cat (F <i>trans</i> to Cat)</b> |                   |                   |                   |
|-----------------------------------------------------------------------|-------------------|-------------------|-------------------|
| P                                                                     | 1.71886296270863  | -0.65523073448240 | -0.03741171281204 |
| Cl                                                                    | -4.50454281482155 | 1.45390580246339  | 0.25632599374963  |
| Cl                                                                    | -1.62916449902515 | 2.71843583091248  | -0.00064950036465 |
| Cl                                                                    | -2.24852093718944 | -3.47304187041475 | 0.20574025961180  |
| Cl                                                                    | -4.80701904635617 | -1.65511342575065 | 0.34628244987042  |
| F                                                                     | 2.71112854620274  | -1.98241582307783 | 0.04128562295671  |
| O                                                                     | 0.27282068168260  | -1.84480510612659 | -0.03743524764144 |
| O                                                                     | 0.50396723742544  | 0.63874537385133  | -0.13868660545924 |
| C                                                                     | 3.12691970660599  | 0.59851410307666  | -0.01719991798500 |
| C                                                                     | -0.73521604383043 | 0.20256773938071  | -0.02734403324520 |
| C                                                                     | 1.57345664304261  | -0.68212094718506 | 1.85622144043305  |
| C                                                                     | -0.85581965585933 | -1.19810904759265 | 0.02461030705909  |
| C                                                                     | -3.24825867752100 | -0.93940265646908 | 0.20786389047983  |
| C                                                                     | -2.11498433277072 | -1.76107754624606 | 0.14186274367073  |
| C                                                                     | 2.92575010677511  | 1.98137065711291  | -0.01220148533005 |
| C                                                                     | -3.11845901726640 | 0.43845894934635  | 0.16395301945381  |
| C                                                                     | -1.84497431360008 | 1.01246836918381  | 0.04866707494444  |
| C                                                                     | 4.44824509606807  | 0.14866908732445  | 0.00219235517141  |
| C                                                                     | 1.72031262058901  | -0.81619355587757 | -1.92443803492991 |
| C                                                                     | 1.74718257826583  | -2.06566996900732 | -2.54504277775086 |
| C                                                                     | 1.69997218994260  | -1.87347784090730 | 2.57241780367611  |
| C                                                                     | 1.32870187521862  | 0.47721931676713  | 2.58947003792383  |
| C                                                                     | 1.70428334968352  | 0.30653480692088  | -2.74873254307651 |
| C                                                                     | 3.99243759562833  | 2.86919766512757  | 0.01593365655172  |
| C                                                                     | 1.60205332596674  | -1.90089603210432 | 3.95544348808280  |
| C                                                                     | 1.36769696140368  | -0.73461213997838 | 4.66798588537582  |
| C                                                                     | 5.29645649579910  | 2.40193103932513  | 0.03848835477158  |
| C                                                                     | 5.51618910871554  | 1.03366342776238  | 0.02984608391705  |
| C                                                                     | 1.22819177375088  | 0.45579527360977  | 3.97433727116557  |
| C                                                                     | 1.72123567234784  | 0.19315000740102  | -4.13239786791138 |
| C                                                                     | 1.76171725506742  | -2.18574618413490 | -3.92687561020852 |
| C                                                                     | 1.75088893291450  | -1.05588928406172 | -4.73111561378126 |
| H                                                                     | 1.92354420353627  | 2.38580613010159  | -0.03496033216687 |
| H                                                                     | 4.65833352029317  | -0.91034567702552 | -0.00515938592915 |
| H                                                                     | 1.74113920168871  | -2.96607701868497 | -1.94796258042016 |
| H                                                                     | 1.86303496895686  | -2.80415240308527 | 2.04939440551221  |
| H                                                                     | 1.21327825679171  | 1.42636516100450  | 2.08522088629459  |
| H                                                                     | 1.68464561109778  | 1.29700905333967  | -2.31557601838937 |
| H                                                                     | 3.79691958254577  | 3.93481542003710  | 0.01976472326831  |
| H                                                                     | 1.70403048716950  | -2.84442108136754 | 4.47832838455447  |
| H                                                                     | 1.28830738049460  | -0.75579269504465 | 5.74800054355922  |
| H                                                                     | 6.12956467995583  | 3.09367734694988  | 0.06122657626866  |
| H                                                                     | 6.52792139621894  | 0.64639005745357  | 0.04498990874363  |
| H                                                                     | 1.03504706928955  | 1.37808877255313  | 4.50866333529985  |
| H                                                                     | 1.70860681675522  | 1.08902850468766  | -4.74130149045274 |
| H                                                                     | 1.77807168774925  | -3.17117538754366 | -4.37694719663970 |
| H                                                                     | 1.76151375989221  | -1.14876146952485 | -5.81026854787231 |

**Table S18.** XYZ coordinates of the optimized geometry of AsPh<sub>3</sub>Cat

| <u>AsPh<sub>3</sub>Cat</u> |                   |                   |                   |
|----------------------------|-------------------|-------------------|-------------------|
| As                         | 1.19819314927206  | -0.07524048677052 | 0.01697935961537  |
| Cl                         | -5.08077610540807 | 2.09981097991558  | -0.35177037837814 |
| Cl                         | -2.17594223299611 | 3.31012234927221  | -0.37509778704136 |
| Cl                         | -2.92417934610297 | -2.85144982044215 | 0.06890063280618  |
| Cl                         | -5.44995705647784 | -0.98880523642882 | -0.12629321826055 |
| O                          | -0.36697126976883 | -1.26634078690286 | -0.04218032638643 |
| O                          | -0.07345693161469 | 1.19748705872365  | -0.20583146809770 |
| C                          | 2.55118696861960  | 1.34852862568817  | -0.06787410744379 |
| C                          | -1.34740183539265 | 0.77776374581140  | -0.19471549996641 |
| C                          | 1.61335390019304  | -0.77169096486499 | 1.77506935803866  |
| C                          | -1.49473449990737 | -0.60435434906641 | -0.09971103076571 |
| C                          | -3.87871523056656 | -0.30940001482753 | -0.15105462767919 |
| C                          | -2.76572796073972 | -1.15157142869831 | -0.06975426445235 |
| C                          | 2.27816270230249  | 2.70419595311819  | 0.09591041945994  |
| C                          | -3.71752413287772 | 1.06794855941917  | -0.24982986706599 |
| C                          | -2.43152416740171 | 1.61974522558957  | -0.26601236220776 |
| C                          | 3.87599654224071  | 0.94422110704094  | -0.23569683393875 |
| C                          | 1.84032663258543  | -1.09440447295128 | -1.48374660570775 |
| C                          | 1.95663054634943  | -2.47890822589825 | -1.42064867420987 |
| C                          | 1.10447489022559  | -1.99471801380298 | 2.21790719136406  |
| C                          | 2.44435756601348  | -0.03580981204357 | 2.61763280838017  |
| C                          | 2.15078777207396  | -0.42152892141217 | -2.65985105256394 |
| C                          | 3.31207247051959  | 3.63217275422716  | 0.08702287057138  |
| C                          | 1.45099242904920  | -2.47761581542393 | 3.46959812406836  |
| C                          | 2.28178853568630  | -1.74277842501340 | 4.30164872872455  |
| C                          | 4.62448123677988  | 3.22062555566422  | -0.07832982586902 |
| C                          | 4.90552275747418  | 1.87136436624589  | -0.23912512344853 |
| C                          | 2.76952244852324  | -0.51812023462323 | 3.87642413824905  |
| C                          | 2.56993455868263  | -1.13485801280130 | -3.77323597509086 |
| C                          | 2.40216290626611  | -3.18220287540200 | -2.52825349960684 |
| C                          | 2.70134389759340  | -2.51298781985201 | -3.70637840238036 |
| H                          | 1.26485319380885  | 3.05451231943583  | 0.22759262559995  |
| H                          | 4.12133836940917  | -0.10424368011177 | -0.36182115418566 |
| H                          | 1.71217394538779  | -3.01880606861636 | -0.51579834515743 |
| H                          | 0.42526187227199  | -2.56778344392684 | 1.60547831510476  |
| H                          | 2.84260953423698  | 0.92082715417108  | 2.31133045505948  |
| H                          | 2.07316245803906  | 0.65715882441825  | -2.71844364640797 |
| H                          | 3.08464902731703  | 4.68285389721839  | 0.21062178045430  |
| H                          | 1.05679075615446  | -3.43001863323615 | 3.79790247014444  |
| H                          | 2.54128952582521  | -2.12097745954406 | 5.28168507751555  |
| H                          | 5.42637696164362  | 3.94720048850191  | -0.08338912871299 |
| H                          | 5.92695433780176  | 1.53889688929019  | -0.36918572864035 |
| H                          | 3.40755130329674  | 0.06942206189010  | 4.52274568682270  |
| H                          | 2.79861549343817  | -0.60953183369204 | -4.69075005580022 |
| H                          | 2.50570770093967  | -4.25755389826434 | -2.47285666630261 |
| H                          | 3.03748737923334  | -3.06718818102465 | -4.57267138621039 |



**Table S19.** XYZ coordinates of the optimized geometry of F $\cdots$ AsPh<sub>3</sub>Cat (F *trans* to Ph)

| <b>F<math>\cdots</math>AsPh<sub>3</sub>Cat (F <i>trans</i> to Ph)</b> |                   |                   |                   |
|-----------------------------------------------------------------------|-------------------|-------------------|-------------------|
| As                                                                    | 0.01109967825219  | -0.08382425195273 | 0.02037325384814  |
| Cl                                                                    | 0.08711923498868  | 0.29806200173442  | 4.91009419189757  |
| Cl                                                                    | 3.01828841180338  | 0.07571433606265  | 6.01195202629172  |
| Cl                                                                    | 5.37997216501748  | -0.42219489659255 | 4.02348514530725  |
| Cl                                                                    | 4.77820212750843  | -0.72238995803659 | 0.95162638966659  |
| F                                                                     | 0.51896945668214  | 1.63757064185116  | 0.17442586021149  |
| O                                                                     | -0.04769717657318 | -0.04026720052410 | 1.95368705772299  |
| O                                                                     | 1.88390497510540  | -0.47799759748428 | 0.33385171435386  |
| C                                                                     | -2.25361637408101 | 1.73809522688199  | 0.45888400075573  |
| C                                                                     | -1.88717002007573 | 0.47230839245227  | 0.00337542814174  |
| C                                                                     | -2.89549671370169 | -0.36483008557352 | -0.46837406968653 |
| C                                                                     | -4.21991638572166 | 0.05198969938575  | -0.51125440174022 |
| C                                                                     | -4.56654142656026 | 1.31568188481323  | -0.06336706794626 |
| C                                                                     | -3.57646677359915 | 2.15336951969068  | 0.42867180695251  |
| C                                                                     | 0.40657299651792  | 0.03337208146437  | -1.91335153298990 |
| C                                                                     | 1.59023315685826  | 0.61577299634206  | -2.36190331944041 |
| C                                                                     | 1.86741159726112  | 0.70952263128294  | -3.71835560563708 |
| C                                                                     | 0.96247241733912  | 0.23513310101042  | -4.65663618611143 |
| C                                                                     | -0.22182849051535 | -0.33909095593006 | -4.22391444264942 |
| C                                                                     | -0.49174215518780 | -0.43742204404966 | -2.86534962553068 |
| C                                                                     | 2.21116467549748  | -0.35592725155431 | 1.59264923672690  |
| C                                                                     | 3.50392248050892  | -0.44285513855926 | 2.07476954888764  |
| C                                                                     | 3.76208334710996  | -0.30959368084872 | 3.44518004137884  |
| C                                                                     | 2.71758593591839  | -0.08420046691906 | 4.32389489409579  |
| C                                                                     | 1.40591613321566  | 0.01567096059633  | 3.84064081507641  |
| C                                                                     | 1.14354657436838  | -0.11770037927869 | 2.48966816985047  |
| C                                                                     | -0.72553501643782 | -4.82195176117491 | 0.18264312934110  |
| C                                                                     | 0.12178605282827  | -4.27538292386140 | -0.76895087336968 |
| C                                                                     | 0.32559868033478  | -2.90245997544327 | -0.81705049330196 |
| C                                                                     | -0.31826042368276 | -2.04893836338949 | 0.07398442959255  |
| C                                                                     | -1.14920516040058 | -2.61342462755923 | 1.03974128131124  |
| C                                                                     | -1.35781656297865 | -3.98474430811230 | 1.08981604393200  |
| H                                                                     | -1.50089580451930 | 2.40882912864741  | 0.84413353823731  |
| H                                                                     | -2.66452956807860 | -1.36868232908090 | -0.80129401272862 |
| H                                                                     | -4.98019263144863 | -0.62019678315596 | -0.88965817409541 |
| H                                                                     | -5.59841295771858 | 1.64346115140338  | -0.09177547481422 |
| H                                                                     | -3.83322848369678 | 3.14103764593885  | 0.79177176445813  |
| H                                                                     | 2.31526562215729  | 0.98601788567560  | -1.65154392600795 |
| H                                                                     | 2.79779946473949  | 1.15940409898396  | -4.04279611826028 |
| H                                                                     | 1.17952733163387  | 0.31111378656900  | -5.71506601278093 |
| H                                                                     | -0.94039114478167 | -0.71481899298703 | -4.94192595910394 |
| H                                                                     | -1.42192750641825 | -0.89774021693895 | -2.56043117405745 |
| H                                                                     | -0.88611212655281 | -5.89234703408865 | 0.22244189591281  |
| H                                                                     | 0.63438688746747  | -4.91811636684599 | -1.47424767585112 |
| H                                                                     | 0.99988234202087  | -2.50189063216041 | -1.56328748381479 |
| H                                                                     | -1.64672457705708 | -1.98081552794866 | 1.76324441789451  |
| H                                                                     | -2.01216426534763 | -4.39903342073574 | 1.84704754807299  |

**Table S20.** XYZ coordinates of the optimized geometry of F $\cdots$ AsPh<sub>3</sub>Cat (F *trans* to Cat)

| <b>F<math>\cdots</math>AsPh<sub>3</sub>Cat (F <i>trans</i> to Cat)</b> |                   |                   |                   |
|------------------------------------------------------------------------|-------------------|-------------------|-------------------|
| As                                                                     | 1.69333428338725  | -0.67192359598798 | 0.06085087629364  |
| Cl                                                                     | -4.63551227639672 | 1.50817824203672  | -0.12256250948151 |
| Cl                                                                     | -1.74132340371290 | 2.73198462503466  | -0.28905515256213 |
| Cl                                                                     | -2.43089435754898 | -3.41866832719235 | 0.32182180475207  |
| Cl                                                                     | -4.97372958843241 | -1.58462064970182 | 0.18367149864860  |
| F                                                                      | 2.74826651969765  | -2.10127535314179 | 0.25327757133190  |
| O                                                                      | 0.10090072995590  | -1.87916202126387 | 0.10406503822103  |
| O                                                                      | 0.37611854448481  | 0.68501196599392  | -0.16201913123549 |
| C                                                                      | 3.15220115965078  | 0.67356850315436  | 0.02894177452037  |
| C                                                                      | -0.85594895449984 | 0.22135095718203  | -0.08297379971306 |
| C                                                                      | 1.49323575400142  | -0.60630619886541 | 2.03501409028972  |
| C                                                                      | -0.99509728144903 | -1.18023622363454 | 0.05970788673020  |
| C                                                                      | -3.40212342180392 | -0.88868856405363 | 0.08700783676958  |
| C                                                                      | -2.27379209058824 | -1.71462912925011 | 0.14563216431066  |
| C                                                                      | 2.91387999201334  | 2.04528982274975  | -0.06066734207356 |
| C                                                                      | -3.25608306484071 | 0.48067048561147  | -0.04953737756416 |
| C                                                                      | -1.97128434430567 | 1.03246567534732  | -0.12904794894289 |
| C                                                                      | 4.47448799870569  | 0.24323166917722  | 0.12310681153646  |
| C                                                                      | 1.71948183506326  | -1.00123306732550 | -1.89113369867974 |
| C                                                                      | 1.68296209376859  | -2.29437928216370 | -2.40575558602147 |
| C                                                                      | 1.58289370176956  | -1.76117442088372 | 2.80780842763123  |
| C                                                                      | 1.27134181877073  | 0.60408324689235  | 2.68334524573243  |
| C                                                                      | 1.78996985032463  | 0.06344957869472  | -2.78183249450871 |
| C                                                                      | 3.96331725503889  | 2.95475887805190  | -0.05226978002873 |
| C                                                                      | 1.47185159485246  | -1.70223436657969 | 4.18948376048912  |
| C                                                                      | 1.26155617842440  | -0.48848567093393 | 4.82686546529689  |
| C                                                                      | 5.27344206411674  | 2.51320969394024  | 0.04472017195612  |
| C                                                                      | 5.52325233373122  | 1.15215415344371  | 0.13076553710583  |
| C                                                                      | 1.15726181421575  | 0.66474722208971  | 4.06622098116311  |
| C                                                                      | 1.83366722661662  | -0.15406585102394 | -4.15295880134815 |
| C                                                                      | 1.72582533483912  | -2.51402168298802 | -3.77487945314308 |
| C                                                                      | 1.80379056908614  | -1.44477769322365 | -4.65564581113672 |
| H                                                                      | 1.90221832682411  | 2.42038484872507  | -0.14034305735494 |
| H                                                                      | 4.69739523982882  | -0.81244772329921 | 0.19286295815361  |
| H                                                                      | 1.61142039496896  | -3.14254158950100 | -1.74004654818249 |
| H                                                                      | 1.73468090588949  | -2.72084472615771 | 2.33584921590467  |
| H                                                                      | 1.18522697460803  | 1.52189001168417  | 2.11747307564465  |
| H                                                                      | 1.81823935769330  | 1.08162013579175  | -2.41678447646337 |
| H                                                                      | 3.75109321392521  | 4.01485517716503  | -0.12128646491380 |
| H                                                                      | 1.54678352756308  | -2.61356613349988 | 4.77043060765859  |
| H                                                                      | 1.17419755126441  | -0.44340932324161 | 5.90549230021921  |
| H                                                                      | 6.09204248668321  | 3.22239238910186  | 0.05310139387717  |
| H                                                                      | 6.54214492512002  | 0.79187812071968  | 0.20600266490045  |
| H                                                                      | 0.98328429770994  | 1.61975424745971  | 4.54674792615297  |
| H                                                                      | 1.88920847476907  | 0.69195193873434  | -4.82700416992796 |
| H                                                                      | 1.69534333110697  | -3.52802723703443 | -4.15465808453569 |
| H                                                                      | 1.83718112310879  | -1.61696275783416 | -5.72440539747259 |

**Table S21.** XYZ coordinates of the optimized geometry of SbPh<sub>3</sub>Cat

| <b>SbPh<sub>3</sub>Cat</b> |                   |                   |                   |
|----------------------------|-------------------|-------------------|-------------------|
| Sb                         | 3.14739978051197  | 0.78774056381514  | 2.43126525410415  |
| Cl                         | 5.82388467227563  | -0.34534837555334 | 6.46045289397355  |
| Cl                         | 8.74556759097912  | -1.25950770020890 | 5.76356054058456  |
| Cl                         | 9.65945641432586  | -1.33336843266723 | 2.77839096285255  |
| Cl                         | 7.63503421782936  | -0.52032026381963 | 0.51822975931126  |
| O                          | 4.98696274608738  | 0.26078028808272  | 1.59458679913573  |
| O                          | 4.23642546073395  | 0.34030101565774  | 4.06685523441878  |
| C                          | 5.88683863452606  | -0.09726440801567 | 2.48723373666835  |
| C                          | 5.48823207810911  | -0.05618798513328 | 3.82879320100812  |
| C                          | 6.36379058881648  | -0.41175187799269 | 4.83465489599868  |
| C                          | 7.66271046840343  | -0.81429346094646 | 4.51298332249760  |
| C                          | 8.06672759466022  | -0.85099438721534 | 3.18392780450612  |
| C                          | 7.17582202206437  | -0.49160294952068 | 2.17014667160587  |
| C                          | 1.55411653398269  | 1.31572171484184  | 3.76284269378323  |
| C                          | 0.31602863498988  | 1.59071838043245  | 3.18225132086374  |
| C                          | -0.76395823110843 | 1.96163142733646  | 3.96881074952910  |
| C                          | -0.61344594014037 | 2.06330929119539  | 5.34437216168770  |
| C                          | 0.61472934065372  | 1.79165338746193  | 5.92674084472269  |
| C                          | 1.69900123856315  | 1.41775122510863  | 5.14265789406147  |
| C                          | 3.25596464065935  | 2.59388707181561  | 1.31593256306353  |
| C                          | 2.51725009606667  | 3.69832403622967  | 1.72834628919043  |
| C                          | 2.54610026274895  | 4.86949746957228  | 0.98415679439953  |
| C                          | 3.30478883272806  | 4.93866628704136  | -0.17343407184258 |
| C                          | 4.04938801638218  | 3.84076881255297  | -0.57997279749219 |
| C                          | 4.03604560748727  | 2.67053251968731  | 0.16329013215093  |
| C                          | 2.23229401783977  | -0.82757525377770 | 1.41630829959345  |
| C                          | 2.72967535604891  | -1.26663203938689 | 0.19219417863311  |
| C                          | 2.10794309567034  | -2.31831364585645 | -0.46298414623729 |
| C                          | 1.00811150108683  | -2.94418922416042 | 0.10618368334670  |
| C                          | 0.52512848756956  | -2.51848573558698 | 1.33359162557356  |
| C                          | 1.13248506565437  | -1.45705199621130 | 1.98920108436537  |
| H                          | 0.17802306787315  | 1.51740467530541  | 2.10836308354396  |
| H                          | -1.71983445886689 | 2.17129991046711  | 3.50702120475974  |
| H                          | -1.45377870584830 | 2.35405349698510  | 5.96093074792045  |
| H                          | 0.73455997175073  | 1.86891665464160  | 6.99930744219874  |
| H                          | 2.64649669911549  | 1.20372483512628  | 5.61631853764875  |
| H                          | 1.92118657195063  | 3.66463004109405  | 2.63072947503297  |
| H                          | 1.97515492249725  | 5.72708834742908  | 1.31424945941399  |
| H                          | 3.32308282482376  | 5.85052823031848  | -0.75565577372547 |
| H                          | 4.65110847247733  | 3.89549940595660  | -1.47745676363764 |
| H                          | 4.64771159560619  | 1.83762139719859  | -0.15164642975026 |
| H                          | 3.60479849753284  | -0.81078632248970 | -0.24967359352903 |
| H                          | 2.49136129593228  | -2.65542707241200 | -1.41678900516325 |
| H                          | 0.53142603185105  | -3.76951632398410 | -0.40599566749787 |
| H                          | -0.32460749303259 | -3.01223514782251 | 1.78579074716659  |
| H                          | 0.74268088013112  | -1.13493088259257 | 2.94637315956046  |

**Table S22.** XYZ coordinates of the optimized geometry of F $\cdots$ SbPh<sub>3</sub>Cat (F *trans* to Ph)

| <b>F<math>\cdots</math>SbPh<sub>3</sub>Cat (F <i>trans</i> to Ph)</b> |                   |                   |                   |
|-----------------------------------------------------------------------|-------------------|-------------------|-------------------|
| Sb                                                                    | 0.03410398414455  | 0.02639462520580  | 0.02678228289109  |
| Cl                                                                    | 0.12611867805021  | 0.23024313531699  | 5.05478121565981  |
| Cl                                                                    | 3.03801846876070  | 0.01772764204726  | 6.19840928498637  |
| Cl                                                                    | 5.44437062228817  | -0.32982774576138 | 4.23052214172331  |
| Cl                                                                    | 4.90038005239891  | -0.49201729512158 | 1.14163218578433  |
| F                                                                     | 0.46355067452901  | 1.92784631083794  | 0.17013894232244  |
| O                                                                     | 0.02315874378550  | 0.06420873570242  | 2.11457722339623  |
| O                                                                     | 2.04909337839941  | -0.28527746345275 | 0.46299018367114  |
| C                                                                     | -2.49907257826230 | 1.78663870122542  | 0.37986348806720  |
| C                                                                     | -2.06204656244420 | 0.52080549703556  | -0.00148510547536 |
| C                                                                     | -3.00596554870786 | -0.41520486721993 | -0.41411088770851 |
| C                                                                     | -4.35709345721395 | -0.09371866502155 | -0.45604666610469 |
| C                                                                     | -4.78197305375774 | 1.16800837439707  | -0.07044284517195 |
| C                                                                     | -3.84957022225518 | 2.10500492679319  | 0.35202786347386  |
| C                                                                     | 0.50370257046234  | 0.10609569549854  | -2.07319401851173 |
| C                                                                     | 1.82077856210967  | 0.11757028814764  | -2.52754588142309 |
| C                                                                     | 2.09748322845308  | 0.15876849731842  | -3.88768713492724 |
| C                                                                     | 1.06526832956411  | 0.19211349205078  | -4.81390314012882 |
| C                                                                     | -0.24828256512209 | 0.18685724633687  | -4.37114925514200 |
| C                                                                     | -0.52431454745948 | 0.14367543272408  | -3.01042924447981 |
| C                                                                     | 2.31428984635729  | -0.20892241780511 | 1.74243145727955  |
| C                                                                     | 3.59943721193691  | -0.29446287605787 | 2.25244699709411  |
| C                                                                     | 3.83456783279565  | -0.22275552318890 | 3.62963634232308  |
| C                                                                     | 2.77026967435790  | -0.06339645963655 | 4.49930453555954  |
| C                                                                     | 1.46856387021036  | 0.03429387757888  | 3.99498427742455  |
| C                                                                     | 1.22337808999281  | -0.03029830123959 | 2.63246594286854  |
| C                                                                     | -0.72131329381885 | -4.89164208757502 | 0.15673508272091  |
| C                                                                     | -0.10059872959243 | -4.30892617215615 | -0.93734199799259 |
| C                                                                     | 0.11548121397458  | -2.93656074893610 | -0.96689330382145 |
| C                                                                     | -0.28305156413134 | -2.12598808504902 | 0.09143740547423  |
| C                                                                     | -0.89839755340705 | -2.72449905225943 | 1.18944739264971  |
| C                                                                     | -1.11855346165679 | -4.09479682691792 | 1.22110884709495  |
| H                                                                     | -1.78053461567476 | 2.52780789090994  | 0.69968929707650  |
| H                                                                     | -2.69566807944113 | -1.41271220968266 | -0.70254327169007 |
| H                                                                     | -5.07650702009135 | -0.83391634090580 | -0.78420493764642 |
| H                                                                     | -5.83513078140602 | 1.41964691403193  | -0.09573847574367 |
| H                                                                     | -4.17452533618677 | 3.09125007752045  | 0.66013092609856  |
| H                                                                     | 2.63943915130419  | 0.09247676757584  | -1.82100116753433 |
| H                                                                     | 3.12723397852447  | 0.16597795460701  | -4.22346834344541 |
| H                                                                     | 1.28373849436507  | 0.22505702396750  | -5.87416688538129 |
| H                                                                     | -1.06311926181417 | 0.21829066287600  | -5.08413856328414 |
| H                                                                     | -1.55884067649622 | 0.14780254417308  | -2.68776903205261 |
| H                                                                     | -0.89182942465778 | -5.96094810969190 | 0.18205731476843  |
| H                                                                     | 0.21931769463484  | -4.92173714209455 | -1.77138528633782 |
| H                                                                     | 0.60103326170152  | -2.50211812024622 | -1.83252467091141 |
| H                                                                     | -1.21054775922195 | -2.12044990992768 | 2.03181010270971  |
| H                                                                     | -1.59900352028185 | -4.54108889393095 | 2.08327438179623  |

**Table S23.** XYZ coordinates of the optimized geometry of F<sup>-</sup>...SbPh<sub>3</sub>Cat (F *trans* to Cat)

| <b>F<sup>-</sup>...SbPh<sub>3</sub>Cat (F <i>trans</i> to Cat)</b> |                   |                   |                   |
|--------------------------------------------------------------------|-------------------|-------------------|-------------------|
| Sb                                                                 | 2.72947071466870  | 0.87033245981100  | 1.73807551249655  |
| Cl                                                                 | 5.62785945588521  | -0.03424204053057 | 5.72626916755521  |
| Cl                                                                 | 8.51217314932448  | -0.99483627142648 | 4.94521520709310  |
| Cl                                                                 | 9.29584568980770  | -1.20239948991475 | 1.92453772216116  |
| Cl                                                                 | 7.16307108272919  | -0.51864742555081 | -0.27368647104585 |
| F                                                                  | 1.76891830460255  | 1.06471967199205  | 0.05169058767166  |
| O                                                                  | 4.57138344544703  | 0.28752247330538  | 0.83688780285145  |
| O                                                                  | 3.93145566977012  | 0.54916167043569  | 3.41173667795859  |
| C                                                                  | 5.48222583934076  | 0.00901605174350  | 1.73249208673397  |
| C                                                                  | 5.14212078537492  | 0.13671090731146  | 3.10664389654223  |
| C                                                                  | 6.08420559361701  | -0.17912809807953 | 4.07173669372006  |
| C                                                                  | 7.37010555851609  | -0.60172287662540 | 3.71822388276737  |
| C                                                                  | 7.71246794667317  | -0.70409560448872 | 2.38165808701286  |
| C                                                                  | 6.76663493077016  | -0.39884861955827 | 1.39775067254810  |
| C                                                                  | 1.06978796412746  | 1.41104979096290  | 3.01510506913335  |
| C                                                                  | -0.15130369759732 | 1.72526989275384  | 2.42315676119263  |
| C                                                                  | -1.24397720083187 | 2.08443062936624  | 3.20058825921349  |
| C                                                                  | -1.13069303792353 | 2.13465742931141  | 4.58220639982493  |
| C                                                                  | 0.08103390130745  | 1.82370446344813  | 5.18134672970253  |
| C                                                                  | 1.17514495305564  | 1.46444225474120  | 4.40367211800928  |
| C                                                                  | 3.45199453394796  | 2.89177738212515  | 1.49179602335480  |
| C                                                                  | 3.04851818402565  | 3.88271222369345  | 2.37911205274524  |
| C                                                                  | 3.50040422107665  | 5.18949553854365  | 2.24098653115385  |
| C                                                                  | 4.35786386838967  | 5.52309890541973  | 1.20498110019868  |
| C                                                                  | 4.76166635402275  | 4.54202497459888  | 0.31075881244588  |
| C                                                                  | 4.31608735658442  | 3.23550590023475  | 0.45486955612058  |
| C                                                                  | 2.22299319846144  | -1.21962743087709 | 1.63038929364501  |
| C                                                                  | 2.54397374629222  | -1.97612553207045 | 0.50715645141450  |
| C                                                                  | 2.17342876650434  | -3.31060382603311 | 0.42794995380620  |
| C                                                                  | 1.48157250634474  | -3.90790353915642 | 1.47248137019607  |
| C                                                                  | 1.16532189427939  | -3.16272030406103 | 2.59738200350753  |
| C                                                                  | 1.53293735362910  | -1.82484539946219 | 2.67251858867195  |
| H                                                                  | -0.25518522421883 | 1.69247371969375  | 1.34595448889069  |
| H                                                                  | -2.18602127213373 | 2.32756618391954  | 2.72422522674532  |
| H                                                                  | -1.98264023978239 | 2.41625468684174  | 5.18867242806236  |
| H                                                                  | 0.17865767798756  | 1.86138926147291  | 6.25943188315027  |
| H                                                                  | 2.11469520385109  | 1.22664707206009  | 4.88660523194330  |
| H                                                                  | 2.37250630945584  | 3.64891042969860  | 3.19188291012720  |
| H                                                                  | 3.18049742514655  | 5.94572854586834  | 2.94740085923784  |
| H                                                                  | 4.71260411736864  | 6.54069464415775  | 1.09584063702699  |
| H                                                                  | 5.43377675003932  | 4.79142092072248  | -0.50124747042279 |
| H                                                                  | 4.65795866370687  | 2.48236678554875  | -0.24105553286578 |
| H                                                                  | 3.09398680188570  | -1.53091927661328 | -0.31053932059009 |
| H                                                                  | 2.42805483499690  | -3.88626696559902 | -0.45363714071819 |
| H                                                                  | 1.19265137330201  | -4.94979915934327 | 1.40917865745986  |
| H                                                                  | 0.62935819427522  | -3.62020454341317 | 3.41986101862805  |
| H                                                                  | 1.26775635189586  | -1.25603846697890 | 3.55542752292186  |

**Table S24.** XYZ coordinates of the optimized geometry of BiPh<sub>3</sub>Cat

| <b>BiPh<sub>3</sub>Cat</b> |                   |                   |                   |
|----------------------------|-------------------|-------------------|-------------------|
| Bi                         | 2.98079297828678  | 0.54993407926785  | 2.39139397541857  |
| Cl                         | 5.98469736690295  | 0.29439875471782  | 6.39593635654408  |
| Cl                         | 9.01085998418956  | -0.06577933008200 | 5.64469756826486  |
| Cl                         | 9.81170848454170  | -0.43792874287322 | 2.64901262238728  |
| Cl                         | 7.57496242405065  | -0.49721622339966 | 0.44814978394936  |
| O                          | 4.86193459300137  | -0.27911080307305 | 1.56475113890981  |
| O                          | 4.19266287795112  | 0.09531764409628  | 4.08896299255971  |
| C                          | 5.83117848866533  | -0.24551541479205 | 2.44865462133108  |
| C                          | 5.47972158534482  | -0.05321524582794 | 3.79957819254644  |
| C                          | 6.46324555325381  | 0.02587174802402  | 4.76937643629325  |
| C                          | 7.80882848890761  | -0.11462776653595 | 4.42458689368384  |
| C                          | 8.16306842894587  | -0.28820068088650 | 3.09297277387007  |
| C                          | 7.17460760562500  | -0.33222922128772 | 2.10979715664196  |
| C                          | 1.39229251604181  | 1.17153118167378  | 3.84276210666866  |
| C                          | 0.13895420075678  | 1.46800935670738  | 3.31739201720562  |
| C                          | -0.87345469787641 | 1.91341891618342  | 4.15691942033304  |
| C                          | -0.63073017719609 | 2.05920750774337  | 5.51465095516708  |
| C                          | 0.62138644649718  | 1.76276657965753  | 6.03271568253075  |
| C                          | 1.64177421859890  | 1.31948416655244  | 5.20057943040476  |
| C                          | 3.39324212056998  | 2.45442382457967  | 1.33699893036996  |
| C                          | 2.63104327653639  | 3.56503232522048  | 1.66962675311834  |
| C                          | 2.86527301156850  | 4.76598330888206  | 1.01388369449040  |
| C                          | 3.85332375629216  | 4.84621185851853  | 0.04408818072361  |
| C                          | 4.61502689258080  | 3.73009624166337  | -0.27040714811513 |
| C                          | 4.39294179862189  | 2.52229748193254  | 0.37701510309126  |
| C                          | 1.94716512834822  | -1.04327717822553 | 1.26434932083902  |
| C                          | 2.45655538412224  | -1.47087527972419 | 0.04576310669351  |
| C                          | 1.77971427116783  | -2.46098873887995 | -0.65135923904285 |
| C                          | 0.62359542611298  | -3.02180739885649 | -0.12690440369925 |
| C                          | 0.13480425458266  | -2.59617976500193 | 1.09849364780170  |
| C                          | 0.79642849753810  | -1.59824667967461 | 1.80226342392801  |
| H                          | -0.06722662578313 | 1.35585109665352  | 2.25800913982873  |
| H                          | -1.84850961975716 | 2.14480187247353  | 3.74850710312469  |
| H                          | -1.41934421508151 | 2.40495045203114  | 6.16977470658004  |
| H                          | 0.81024992721805  | 1.87686022175369  | 7.09199904649144  |
| H                          | 2.61461206554398  | 1.09392009156881  | 5.61450898036788  |
| H                          | 1.86692355582486  | 3.51409117801562  | 2.43569795471838  |
| H                          | 2.27777277586979  | 5.63835822578757  | 1.26762685919182  |
| H                          | 4.03598319323365  | 5.78446500423242  | -0.46276039674398 |
| H                          | 5.39396846826155  | 3.79716051127504  | -1.01821284204407 |
| H                          | 5.00394378942595  | 1.66146214506730  | 0.14146106443395  |
| H                          | 3.37205261318200  | -1.06074703713703 | -0.35670757028078 |
| H                          | 2.16522270534664  | -2.80036596627480 | -1.60354093313947 |
| H                          | 0.10583029535180  | -3.79842122070994 | -0.67385766822594 |
| H                          | -0.75982655423148 | -3.04104474843665 | 1.51326529922543  |
| H                          | 0.41061144106436  | -1.27386133260002 | 2.76096476156301  |

**Table S25.** XYZ coordinates of the optimized geometry of F<sup>-</sup>⋯BiPh<sub>3</sub>Cat (F *trans* to Ph)

| <b>F<sup>-</sup>⋯BiPh<sub>3</sub>Cat (F <i>trans</i> to Ph)</b> |                   |                   |                   |
|-----------------------------------------------------------------|-------------------|-------------------|-------------------|
| Bi                                                              | -0.00173047086818 | 0.01575880825333  | 0.00773845731932  |
| Cl                                                              | 0.13355701561773  | 0.17145456085808  | 5.12652791479896  |
| Cl                                                              | 3.03863061742674  | 0.00802076907775  | 6.29107975787584  |
| Cl                                                              | 5.46627217096213  | -0.27209176175011 | 4.33564696373397  |
| Cl                                                              | 4.94716840536104  | -0.41841598037841 | 1.24581340681739  |
| F                                                               | 0.43169573720859  | 2.02976508900070  | 0.15005803025787  |
| O                                                               | 0.03698951787685  | 0.02729812918012  | 2.21042679934060  |
| O                                                               | 2.11849807728903  | -0.28044323244154 | 0.53578200140250  |
| C                                                               | -2.57899309580215 | 1.88214784484813  | 0.12769153893172  |
| C                                                               | -2.18214006491571 | 0.55812498647054  | -0.01067138618936 |
| C                                                               | -3.13467910284064 | -0.43742928652876 | -0.17697614432959 |
| C                                                               | -4.48596744010012 | -0.11150823765022 | -0.20862578007170 |
| C                                                               | -4.88362230385970 | 1.20937673474496  | -0.06909121014161 |
| C                                                               | -3.92959008664178 | 2.20333667609918  | 0.10081261728211  |
| C                                                               | 0.56086287723430  | 0.12044627054179  | -2.16024824956436 |
| C                                                               | 1.88688508203649  | 0.07115704775322  | -2.57120277482076 |
| C                                                               | 2.19131119460367  | 0.14655026027959  | -3.92432839382005 |
| C                                                               | 1.17929506410047  | 0.27099346805046  | -4.86607836240856 |
| C                                                               | -0.14362131691271 | 0.32098612313173  | -4.45380187482483 |
| C                                                               | -0.45238923870897 | 0.24495485140548  | -3.10072762721177 |
| C                                                               | 2.34795716836438  | -0.19677316936842 | 1.81655493530048  |
| C                                                               | 3.63045047849187  | -0.25278636747951 | 2.34630555883746  |
| C                                                               | 3.85785994173018  | -0.18891215683746 | 3.72460590487116  |
| C                                                               | 2.78576563043522  | -0.05850259953547 | 4.58810507616188  |
| C                                                               | 1.48817943487128  | 0.01728994483809  | 4.07182983543363  |
| C                                                               | 1.24353386265669  | -0.04272010911955 | 2.70637009512103  |
| C                                                               | -0.71103570529987 | -4.99875620366262 | 0.11730362823098  |
| C                                                               | -0.33166940405551 | -4.36552013671003 | -1.05646228888774 |
| C                                                               | -0.13303009599576 | -2.98960508593570 | -1.07117954617946 |
| C                                                               | -0.31253742105666 | -2.24130020930900 | 0.08434036530868  |
| C                                                               | -0.69061463714996 | -2.87855627643758 | 1.26077021832099  |
| C                                                               | -0.88971344400291 | -4.25351764347870 | 1.27437674302431  |
| H                                                               | -1.83437366914019 | 2.65435893699437  | 0.26082147948307  |
| H                                                               | -2.83517645216651 | -1.47461735992247 | -0.27406561408953 |
| H                                                               | -5.22541632752163 | -0.89229141611557 | -0.33779954101732 |
| H                                                               | -5.93598225896113 | 1.46434749942661  | -0.08891461125316 |
| H                                                               | -4.23809209921215 | 3.23512641385480  | 0.21640320562077  |
| H                                                               | 2.68149414307375  | -0.02127121845080 | -1.84260156008715 |
| H                                                               | 3.22590646623688  | 0.11057779302171  | -4.24253152994960 |
| H                                                               | 1.42246278069232  | 0.33273202603843  | -5.91948583782303 |
| H                                                               | -0.93784047656813 | 0.42302032498988  | -5.18311851775216 |
| H                                                               | -1.49034970847714 | 0.29295140338639  | -2.78913162409577 |
| H                                                               | -0.86362885893092 | -6.07085247103236 | 0.13160180260457  |
| H                                                               | -0.18539896291972 | -4.94063144752559 | -1.96274681430124 |
| H                                                               | 0.16946994108806  | -2.50926700646458 | -1.99479993474280 |
| H                                                               | -0.82837963300849 | -2.30786326551720 | 2.17004234947573  |
| H                                                               | -1.18143533224106 | -4.74384632059362 | 2.19509553800656  |

**Table S26.** XYZ coordinates of the optimized geometry of F<sup>-</sup>⋯BiPh<sub>3</sub>Cat (F *trans* to Cat)

| <b>F<sup>-</sup>⋯BiPh<sub>3</sub>Cat (F <i>trans</i> to Cat)</b> |                   |                   |                   |
|------------------------------------------------------------------|-------------------|-------------------|-------------------|
| Bi                                                               | 2.59914181161580  | 0.71482019704681  | 1.67859608846044  |
| Cl                                                               | 5.70848382671248  | 0.16781987507118  | 5.67816771166585  |
| Cl                                                               | 8.74112217238946  | 0.00719696764383  | 4.89221729861312  |
| Cl                                                               | 9.54177221283296  | -0.10546608533879 | 1.86896164091626  |
| Cl                                                               | 7.29599970557955  | -0.08860880239431 | -0.32132784907915 |
| F                                                                | 1.40116268012551  | 1.23666020989106  | 0.06664423910628  |
| O                                                                | 4.58938241830121  | -0.03798438159697 | 0.78342535174645  |
| O                                                                | 3.90720818665172  | 0.13578254672561  | 3.38199217258783  |
| C                                                                | 5.53049295193452  | -0.02167194763942 | 1.68188064341291  |
| C                                                                | 5.17092582786866  | 0.05974842588193  | 3.06371430788557  |
| C                                                                | 6.17794798217273  | 0.07408708028782  | 4.02072930357916  |
| C                                                                | 7.52958238434741  | 0.01080408567054  | 3.66771067240172  |
| C                                                                | 7.88252958235208  | -0.04369993066336 | 2.33152573836705  |
| C                                                                | 6.88347316872851  | -0.04582398657644 | 1.35375950789276  |
| C                                                                | 1.03310571964249  | 1.32540807557887  | 3.19211409649049  |
| C                                                                | -0.17277277220417 | 1.83910396189517  | 2.72597444163312  |
| C                                                                | -1.15201370940935 | 2.24655369086688  | 3.62372291447031  |
| C                                                                | -0.92914453733953 | 2.14563513266103  | 4.98934386134990  |
| C                                                                | 0.27442654636814  | 1.63602353644463  | 5.45543099006154  |
| C                                                                | 1.25583949799814  | 1.22447463295464  | 4.56122692015551  |
| C                                                                | 3.58232352830003  | 2.71901769883158  | 1.47775504765338  |
| C                                                                | 3.13175829248821  | 3.73022872673996  | 2.31065438618549  |
| C                                                                | 3.70563448766055  | 4.99360678940047  | 2.23509321985941  |
| C                                                                | 4.72570594023445  | 5.24045370186068  | 1.32969510243595  |
| C                                                                | 5.17087429697223  | 4.22245490406427  | 0.49904226458435  |
| C                                                                | 4.60262152675941  | 2.95713062787930  | 0.56921076736926  |
| C                                                                | 1.90710153131762  | -1.38418041657276 | 1.35552235806116  |
| C                                                                | 2.67043051776923  | -2.33282036962309 | 0.69250225821411  |
| C                                                                | 2.16436450348065  | -3.61550201609707 | 0.52203834360695  |
| C                                                                | 0.90927789074801  | -3.94869774128375 | 1.00967914745482  |
| C                                                                | 0.15377623291045  | -2.99389346068863 | 1.67278642501033  |
| C                                                                | 0.65130007062099  | -1.70815248289458 | 1.84417556197516  |
| H                                                                | -0.34698211386065 | 1.92667542708389  | 1.66044365083255  |
| H                                                                | -2.08856304985084 | 2.64639804775891  | 3.25416432192208  |
| H                                                                | -1.69114622813811 | 2.46585347349265  | 5.68913406040274  |
| H                                                                | 0.45377925999146  | 1.55909194974005  | 6.52082791592323  |
| H                                                                | 2.19440800814092  | 0.83422694838054  | 4.93371514610065  |
| H                                                                | 2.33863310167363  | 3.54899696393969  | 3.02546394622426  |
| H                                                                | 3.35578526318863  | 5.78106551454836  | 2.89102091641128  |
| H                                                                | 5.17815031194739  | 6.22274780208556  | 1.27514469269236  |
| H                                                                | 5.97385093985221  | 4.40589963071803  | -0.20373661297403 |
| H                                                                | 4.96668567250364  | 2.16748019325546  | -0.07277433420826 |
| H                                                                | 3.64977505822381  | -2.07873458230536 | 0.31504319372236  |
| H                                                                | 2.76015160474752  | -4.35736069811663 | 0.00502052200509  |
| H                                                                | 0.52246797959556  | -4.95111050380960 | 0.87531577742034  |
| H                                                                | -0.82581905924954 | -3.24516421430317 | 2.06001491401302  |
| H                                                                | 0.05231877530395  | -0.97310519849554 | 2.36746695538455  |
